**Regenerative growth is constrained by *brain tumor* to ensure proper patterning in  
*Drosophila***

**Syeda Nayab Fatima Abidi<sup>1</sup> and Rachel K. Smith-Bolton<sup>1,\*</sup>**

<sup>1</sup> Department of Cell and Developmental Biology, University of Illinois Urbana-Champaign, Urbana, IL 61801, USA

\* [rsbolton@illinois.edu](mailto:rsbolton@illinois.edu)

## 1 **Abstract**

2 Some animals respond to injury by inducing new growth to regenerate the lost  
3 structures. This regenerative growth must be carefully controlled and constrained to  
4 prevent overgrowth and to allow correct organization of the regenerating tissue.  
5 However, the factors that restrict regenerative growth have not been identified. Using a  
6 genetic ablation system in the *Drosophila* wing imaginal disc, we have identified one  
7 mechanism that constrains regenerative growth, impairment of which leads to  
8 erroneous patterning of the final appendage. Regenerating discs with reduced levels of  
9 the RNA-regulator Brain tumor (Brat) exhibit enhanced regeneration, but produce adult  
10 wings with disrupted margins that are missing extensive tracts of sensory bristles. In  
11 these mutants, aberrantly high expression of the pro-growth factor Myc and its  
12 downstream targets leads to loss of cell-fate specification. Thus, Brat ensures that the  
13 regenerating tissue forms the proper final structure by constraining expression of pro-  
14 regeneration genes.

15

## 16 **Introduction**

17 Regeneration is the remarkable process by which some organisms replace tissues and  
18 organs after damage such that both morphology and function are restored. Complete  
19 regeneration requires several steps to occur correctly including wound healing, cell  
20 proliferation, and proper patterning and cell-fate specification in the newly formed tissue.  
21 The degree of regenerative capacity varies among different species, ranging from  
22 whole-body regeneration in hydra and planaria to limited tissue regeneration in

23 mammals. Work in several model organisms has identified signaling pathways and  
24 molecular mechanisms that are important for initiating and executing regenerative  
25 growth after tissue damage, including JNK signaling (Bergantiños et al., 2010; Bosch et  
26 al., 2010, 2005; Martín et al., 2017; Tasaki et al., 2011), JAK/STAT signaling (Bando et  
27 al., 2013; Katsuyama et al., 2015; Verghese and Su, 2017), EGFR signaling (Fan et al.,  
28 2014; Jiang et al., 2011; Jin et al., 2015; Nakamura et al., 2007), Hippo signaling  
29 (Bando et al., 2009; Grijalva et al., 2014; Grusche et al., 2011; Hayashi et al., 2014; Sun  
30 and Irvine, 2011), Wnt signaling (Hanovice et al., 2019; Hobmayer et al., 2000;  
31 Kawakami et al., 2006; McClure and Schubiger, 2008; Schubiger et al., 2010; Smith-  
32 Bolton et al., 2009; Wehner et al., 2014), and Myc (Harris et al., 2016; Smith-Bolton et  
33 al., 2009). Many of these mechanisms are also important during normal development,  
34 and the process of regeneration was traditionally thought to be a redeployment of earlier  
35 developmental steps (Bosch et al., 2010; Gupta et al., 2013; Harris et al., 2016; Mader  
36 and Cameron, 2004; Muneoka and Bryant, 1982; Nakamura et al., 2007; Roensch et  
37 al., 2013). However, recent evidence suggests that regeneration is not a simple  
38 reiteration of development but can employ regeneration-specific regulatory mechanisms  
39 (Bosch et al., 2010; Harris et al., 2016; Luttrell et al., 2016; McCusker and Gardiner,  
40 2013; Myohara, 2004; Schuster and Smith-Bolton, 2015; Vizcaya-Molina et al., 2018).  
41 Indeed, faithful regeneration likely requires additional mechanisms, since regrowth  
42 happens in the presence of wound-response signaling and in a developed juvenile or  
43 adult organism. Additionally, pro-growth pathways that are used during normal  
44 development are often activated in new ways and at higher strengths in the  
45 regenerating tissue (Bergantiños et al., 2010; Grusche et al., 2011; Katsuyama et al.,

46 2015; Smith-Bolton et al., 2009). These augmented pro-growth signals must be  
47 constrained as regeneration progresses to prevent overgrowth and to enable re-  
48 establishment of pattern and cell-fate specification. Thus, growth suppressors and  
49 additional patterning factors are likely used to terminate regeneration and allow  
50 differentiation (Sun and Irvine, 2014). However, despite our understanding of the pro-  
51 growth signals needed for regeneration, we do not yet know what factors exist in  
52 different model organisms to restrain growth and promote re-patterning of regenerating  
53 tissue.

54

55 *Drosophila melanogaster* imaginal discs, precursors of adult fly appendages, are simple  
56 columnar epithelia that have well-characterized, complex expression of patterning  
57 genes that determine cell-fate specification. Imaginal discs undergo regeneration after  
58 damage (Hariharan and Serras, 2017), and we have previously used a genetic ablation  
59 system to study patterning in the regenerating tissue (Schuster and Smith-Bolton, 2015;  
60 Smith-Bolton et al., 2009). Here we identify the RNA-regulator Brain tumor (Brat) as a  
61 key constraint on regenerative growth that ensures proper formation of the regenerated  
62 structure. Brat is a member of the TRIM- (tripartite motif containing)-NHL (NCL-1, HT2A,  
63 and LIN-41) family of proteins and functions as a translational repressor by binding to its  
64 target RNAs either independently or in a complex with Pumilio and Nanos (Loedige et  
65 al., 2015, 2014; Sonoda and Wharton, 2001). It acts as a potent differentiation factor  
66 and tumor suppressor in neural and ovarian germline stem cell lineages (Arama et al.,  
67 2000; Betschinger et al., 2006; Harris et al., 2011; Lee et al., 2006). Human and mouse  
68 orthologs of Brat, TRIM3 and TRIM32 respectively, also possess tumor-suppressor

69 activity in glioblastomas and are required for neuronal and muscle differentiation (Chen  
70 et al., 2014; Kudryashova et al., 2012; Nicklas et al., 2012; Schwamborn et al., 2009).

71

72 We show that regenerating wing imaginal discs with reduced levels of Brat regenerate  
73 better than controls, but the resulting adult wings have a disrupted margin. The margin  
74 loses some of the characteristic sensory bristles and veins, demonstrating an error in  
75 cell-fate specification. Importantly, these phenotypes are regeneration-specific, as they  
76 are not observed in the mutant animals after normal development. The enhanced  
77 regeneration is due to increased expression of the growth regulators Myc and Wingless  
78 as well as upregulation of *ilp8*, which delays metamorphosis and allows the damaged  
79 tissue more time to regenerate. Intriguingly, this seemingly beneficial elevated Myc  
80 expression is also responsible for the aberrant cell-fate specification at the wing margin,  
81 through misregulation of downstream target genes, including Chronologically  
82 inappropriate morphogenesis (Chinmo). Hence, Brat acts as an important growth  
83 regulator and protective factor by constraining Myc and Chinmo levels during  
84 regeneration to prevent errors in patterning, cell-fate specification, and differentiation in  
85 the regenerating tissue.

86

## 87 **Results**

88 **Brat suppresses regenerative growth and is required for wing margin cell-fate**  
89 **specification during regeneration**

90 To identify genes important for regenerative growth and re-patterning, we performed a  
91 candidate screen, using our wing imaginal disc ablation system (Smith-Bolton et al.,  
92 2009). The primordial wing was targeted for ablation at the early third-instar larval stage  
93 by using *rotund-GAL4* to drive the expression of the proapoptotic gene *reaper* for 24  
94 hours (Figure 1A). Our ability to restrict damage to 24 hours was provided by *tubulin-*  
95 *GAL80<sup>ts</sup>*, which can inhibit GAL4 activity at 18°C, but allows GAL4-driven cell death at  
96 30°C in the 24-hour window. The extent of wing imaginal disc regeneration in the larvae  
97 was reflected in the adult wing size. Hence, the resulting adult wings were scored based  
98 on size and patterning features to identify mutants that affect genes that are involved in  
99 regulating regenerative growth and establishment of cell fates. There is inherent  
100 variability in this system because of its sensitivity to environmental conditions such as  
101 temperature, humidity, and food quality, causing the results of different experiments to  
102 vary slightly (Brock et al., 2017; Khan et al., 2017; Skinner et al., 2015; Sun and Irvine,  
103 2011; Vonesch et al., 2016). Animals with the same genotype within an experiment also  
104 showed some variation, due to stochastic differences in the time each animal takes to  
105 eclose, with animals that take longer to eclose having larger wings (Khan et al., 2017;  
106 Smith-Bolton et al., 2009). However, differences between control and mutant animals  
107 using this system are reproducible, consistent, and have identified key regeneration  
108 genes (Brock et al., 2017; Khan et al., 2017; Schuster and Smith-Bolton, 2015; Skinner  
109 et al., 2015).

110

111 Using this genetic ablation system, we identified the gene *brain tumor (brat)* as an  
112 important regulator of regenerative growth. *brat<sup>1/+</sup>* mutants that did not experience

113 damage during development had adult wings that were not significantly different in size  
114 from controls (Figure S1A). However, after ablation and regeneration were induced,  
115 *brat*<sup>1/+</sup> mutants showed enhanced regeneration and had adult wings that were, on  
116 average, much larger than controls that had also undergone regeneration (Figure 1B  
117 and 1C). We confirmed this enhanced regeneration phenotype in heterozygotes for  
118 three other *brat* mutant alleles: *brat*<sup>192</sup>, *brat*<sup>150</sup> (Luschnig et al., 2004) and *brat*<sup>11</sup> (Wright  
119 et al., 1981)(Figure S1B).

120  
121 Interestingly, we also discovered a role for *brat* in cell-fate specification during  
122 regeneration. After normal development, *brat*<sup>1/+</sup> mutants had adult wings that were  
123 patterned normally (Figure 1D-E and Figure S1C). To confirm that loss of *brat* does not  
124 cause patterning errors during normal development, we knocked down Brat levels in the  
125 entire wing pouch using *brat* RNAi, which resulted in adult wings that were patterned  
126 normally (Figure S1D and S1E). A previous study in which Brat levels were reduced in  
127 the anterior and posterior compartments of the wing also did not report any patterning  
128 defects (Ferreira et al., 2014). However, when discs were ablated and allowed to  
129 regenerate, *brat* heterozygous mutant wings showed aberrant patterning such that the  
130 wing margin lost sensory bristles and vein material (Figure 1F and 1G). By contrast,  
131 control regenerated wings lost margin tissue at a lower frequency (Figure 1H and 1I).  
132 Furthermore, the extent of margin tissue lost was not as severe in control regenerated  
133 wings as compared to *brat*<sup>1/+</sup> regenerated wings (Figure 1H and 1I). Similar to the  
134 enhanced regeneration seen in *brat* mutants, we confirmed the loss-of-margin defect in  
135 heterozygotes for the additional three mutant alleles (Figure S1F).

136

137 ***brat* regulates entry into metamorphosis**

138 Tissue damage in imaginal discs can induce a systemic response in the larvae, which  
139 extends the larval phase of development and delays pupariation (Halme et al., 2010;  
140 Smith-Bolton et al., 2009). This delay in pupariation is due to expression of the relaxin-  
141 like peptide *ilp8* in damaged discs (Colombani et al., 2012; Garelli et al., 2012). To  
142 determine whether *brat* mutants regenerated better due to an enhanced delay in  
143 pupariation, we measured rates of pupariation in control and mutant animals. We found  
144 that during normal development, control and *brat*<sup>1/+</sup> animals pupariated at the same  
145 time, indicating that the two genotypes develop at similar rates (Figure S2A). After disc  
146 damage, *brat* mutants delayed pupariation an additional day compared to controls in  
147 which discs were also damaged (Figure 2A and Figure S2B). Note that direct  
148 comparisons cannot be made between regenerating larvae that spent 24 hours at 30°C  
149 (Figure 2A, Figure S2B) and normally developing larvae that remain at 18°C (Figure  
150 S2A), due to the effects of temperature on development. Our data show that *brat*<sup>+/+</sup>  
151 mutants are able to stay in the larval stage even longer than controls, giving them more  
152 time to regenerate.

153

154 To determine why discs with reduced Brat had an increased delay in pupariation, we  
155 measured *ilp8* transcript levels through qPCR. Undamaged control animals express  
156 very low *ilp8* levels. However, after regeneration was induced, we saw an 80-fold  
157 increase in *ilp8* levels in controls, while the *brat*<sup>1/+</sup> animals showed a 140-fold increase



158 (Figure 2B). Thus, *brat* suppresses *ilp8* during regeneration, regulating the timing of  
159 pupariation.

160

### 161 ***brat* restricts growth and proliferation during regeneration**

162 Regenerative growth occurs through localized cell proliferation at the wound site (Abbott  
163 et al., 1981; Smith-Bolton et al., 2009). The proliferating cells, known as the blastema,  
164 give rise to the regenerated tissue. The blastema and the subsequent regenerated wing  
165 pouch can be labeled with the wing primordium marker Nubbin (Nub) (Ng et al., 1995).  
166 To determine whether *brat*<sup>1/+</sup> discs regenerated better due to increased growth rates in  
167 the wing pouch, we measured the area of the Nub-expressing cells in control and  
168 *brat*<sup>1/+</sup> regenerating discs. In the initial stages of regeneration, the control and mutant  
169 had similar Nub-expressing areas, indicating equal ablation and equal early regrowth.  
170 However, by 48 hours after tissue damage (recovery time 48, or R48), *brat*<sup>1/+</sup> wing  
171 discs had a significantly bigger Nub-expressing pouch than the control (Figure 2D-F),  
172 indicating that *brat*<sup>1/+</sup> mutants were regenerating faster than controls. To assess whether  
173 this difference in growth rates was due to differences in proliferation, we counted cells  
174 going through mitosis by quantifying Phospho-histone H3 (PH3)-positive nuclei in the  
175 regenerating blastema. Reduction of *brat* resulted in a significantly higher number of  
176 PH3-positive nuclei per area at R0, but this increased proliferation had subsided to  
177 normal levels by R24 (Figure 2G-I). To confirm that the increased number of PH3-  
178 positive nuclei were not simply due to an increased number of total cells in the  
179 blastema, we also counted total Nubbin-positive nuclei in the regenerating blastema to

180 calculate a ratio of proliferating cells to blastema cells (Figure S2C). These data confirm  
181 increased proliferation in *brat*<sup>1/+</sup> regenerating discs at R0. Differences in proliferation  
182 early in regeneration often become evident later when measuring wing pouch area  
183 (Brock et al., 2017). Therefore, reduction of *brat* gives the regenerating tissue a growth  
184 advantage early in regeneration, resulting in a measurable difference in tissue area by  
185 R48.

186

187 Wingless (Wg) and Myc are regulators of regenerative growth and are upregulated at  
188 the wound site after damage (McClure and Schubiger, 2008; Schubiger et al., 2010;  
189 Smith-Bolton et al., 2009). Interestingly, Brat regulates stem cell differentiation in the  
190 brain by suppressing self-renewal signaling pathways such as Wnt signaling, and acting  
191 as a post-transcriptional inhibitor of Myc, to enable specification of progenitor cell fate  
192 (Betschinger et al., 2006; Komori et al., 2014). Additionally, Brat overexpression can  
193 suppress Myc at the post-transcriptional level in wing disc epithelial cells, although loss  
194 of *brat* does not lead to elevated Myc protein in wing discs during normal development  
195 (Ferreira et al., 2014). To determine whether these regulators of regenerative growth  
196 are upregulated in *brat*<sup>1/+</sup> regenerating discs, we examined the expression of Wg and  
197 Myc. Wg is normally expressed along the Dorso-ventral (DV) boundary and in two  
198 concentric circles at the inner and outer edge of the wing pouch (Couso et al., 1993)  
199 (Figure 3A), and Myc is expressed in the wing pouch, but is repressed in the cells at the  
200 DV boundary as they undergo cell cycle and growth arrest (Wu and Johnston, 2010)  
201 (Figure 3B). Both Wg and Myc expression were comparable to controls in undamaged  
202 *brat*<sup>1/+</sup> discs (Figure S3A-E). When damage is induced, Wg is upregulated throughout

203 the blastema by R0 (Smith-Bolton et al., 2009) (Figure 3C). Reduction of *brat*  
204 expression resulted in significantly higher levels of Wg expression at R0 (Figure 3D and  
205 3E) but not at R24 (Figure 3F). After ablation, Myc expression is elevated in the  
206 regenerating tissue (Smith-Bolton et al., 2009) (Figure 3G and 3H). *brat*<sup>1/+</sup> discs  
207 showed significantly higher levels of Myc at R0, which were sustained through R24  
208 (Figure 3I-K). Thus, loss of *brat* caused an increase in the levels of both Wg and Myc  
209 early in regeneration. The elevated expression of these growth regulators likely explains  
210 the high proliferation seen in *brat*<sup>1/+</sup> discs at R0, and the larger wing pouch at R48.

211

## 212 ***brat* is required for margin cell-fate specification during regeneration**

213 Reduction of *brat* during regeneration caused patterning defects specifically at the wing  
214 margin, resulting in the loss of vein at the margin and loss of sensory bristles (Figure  
215 1G). Thus, *brat* is required for correct cell-fate specification at the DV boundary during  
216 regeneration. The wing imaginal disc is divided into the dorsal and the ventral  
217 compartments, with expression of the LIM-homeodomain protein Apterous (Ap) in  
218 dorsal cells. The juxtaposition of the dorsal and ventral cells forms the DV boundary,  
219 which develops into the adult wing margin (Diaz-Benjumea and Cohen, 1993) (Figure  
220 4A). Notch (N) and Wg signaling at the DV boundary are crucial for the correct  
221 organization and cell-fate specification at the boundary (Micchelli et al., 1997). *cut* (*ct*)  
222 and *achaete* (*ac*) are margin-specific genes that are expressed downstream of N and  
223 Wg signaling. *ct* is required for the specification of the wing margin, and *ac* specifies the

224 pro-neural sensory organ precursors (Becam and Milán, 2008; Micchelli et al., 1997)  
225 (Figure 4A).

226

227 To investigate whether the errors in fate specification seen in *brat<sup>1/+</sup>* discs were due to  
228 a compromised compartment boundary, we examined the expression of Ap using the  
229 *ap-lacZ* reporter. *ap-lacZ* expression showed a clear DV boundary in the undamaged  
230 control discs (Figure 4B). The DV boundary remained intact after ablation in control and  
231 *brat<sup>1/+</sup>* discs (Figure 4C-D, Figure S4A and S4B). *ap-lacZ* expression was also seen in  
232 the debris found in the damaged wing imaginal disc, due to the perdurance of  $\beta$ -gal. Wg  
233 expression was restored to its normal DV expression by R48 in both control and *brat<sup>1/+</sup>*  
234 discs (Figure S4C and S4D). Therefore, the patterning defects were not caused by  
235 disruptions in the DV boundary or changes in Wg expression.

236

237 Next, we examined N signaling in *brat<sup>1/+</sup>* discs due to its critical role in specifying fates  
238 at the DV boundary. We used a N signaling reporter, which uses *Notch Response*  
239 *Elements (NREs)* that bind to the Notch co-receptor Suppressor of Hairless, to drive the  
240 expression of GFP (Saj et al., 2010). No difference was detected in the expression of  
241 the N reporter for undamaged control and *brat<sup>1/+</sup>* discs (Figure 4E and 4F). N signaling  
242 at the DV boundary was restored by R24 in controls and continued at R48 (Figure 4G  
243 and 4H). Note that the reporter signal can also be seen in cellular debris in the  
244 regenerating discs due to the perdurance of GFP. Interestingly, *brat<sup>1/+</sup>* discs showed  
245 highly elevated levels of the N signaling reporter at both these time points (Figure 4I and

246 4J). This result is consistent with recent evidence demonstrating Brat's ability to  
247 attenuate N nuclear transport in the brain (Mukherjee et al., 2016). We wondered  
248 whether this elevated N signaling could also disrupt margin fates. However,  
249 overexpressing the N-intracellular domain in the wing pouch during the 24-hour ablation  
250 period (Figure S4E and S4F) resulted in adult wings that were patterned remarkably  
251 well, with significantly fewer wings showing any margin defects when compared to the  
252 control (Figure S4G). Thus, increased N activity during regeneration suppresses margin  
253 defects. Additionally, decreasing N signaling activity in *brat*<sup>1/+</sup> regenerating discs by  
254 using a mutation in the *anterior pharynx defective 1 (aph-1)* gene was unable to rescue  
255 the loss of *brat* phenotype. *aph-1*<sup>D35/+</sup> discs showed significantly reduced N signaling  
256 during normal development (Figure S4H-J) and at R24 during regeneration (Figure  
257 S4K-M), but could not rescue the loss of margin phenotype in the *brat* mutant (Figure  
258 S4N). Thus, while Brat constrains N signaling during regeneration, the elevated N  
259 signaling in *brat*<sup>1/+</sup> mutants does not cause the margin cell-fate specification defects.

260

### 261 ***brat* specifies margin fate by controlling the expression of Cut and Achaete**

262 To understand how patterning was disrupted in *brat*<sup>1/+</sup> regenerating discs, we examined  
263 expression of margin cell-fate genes. Cut (Ct) expression was present along the DV  
264 boundary in both undamaged control and *brat*<sup>1/+</sup> discs (Figure 4K and 4L), consistent  
265 with our results showing that adult undamaged *brat*<sup>1/+</sup> wings do not have margin  
266 defects (Figure S1D). In control regenerating discs, Ct expression was detected at the  
267 DV boundary at R72, which is when regeneration and repatterning are largely complete

268 (Figure 4M). By contrast, Ct expression was either not observed in *brat<sup>1/+</sup>* discs or was  
269 still missing in segments of the DV boundary at R72 (Figure 4N and 4O). These results  
270 indicate a specific error in cell-fate specification, as the DV boundary was intact at R72  
271 (Figure S4A and S4B). Undamaged control and *brat<sup>1/+</sup>* discs also showed appropriate  
272 Ac expression in two stripes of cell directly flanking the DV boundary in the anterior half  
273 of the disc (Figure 4P and 4Q). Ac expression was also detected in control regenerating  
274 discs at R72 (Figure 4R). While Ac-expressing cells appeared in *brat<sup>1/+</sup>* discs, they  
275 were not clearly separated across the DV boundary (Figure 4S). This finding is  
276 consistent with previous reports showing that Ct suppresses Ac at the margin, and  
277 mutations in *ct* lead to aberrant expression of Ac at the DV boundary, followed by  
278 degeneration of the wing margin through cell death (Couso et al., 1994; Jack et al.,  
279 1991).

280

### 281 **High Myc expression perturbs margin cell-fate specification during regeneration**

282 Our results show that Brat both restricts regenerative growth and ensures correct cell-  
283 fate specification at the wing margin. Interestingly, JNK signaling in regenerating tissue  
284 can cause aberrant posterior-to-anterior cell-fate changes, which can be suppressed by  
285 a regeneration-specific protective factor, Taranis, to ensure correct patterning of the  
286 regenerating tissue (Schuster and Smith-Bolton, 2015). Therefore, we wondered  
287 whether unconstrained regenerative growth, or unconstrained expression of growth  
288 drivers, could also have deleterious side effects such as loss of margin cell fates. As Wg  
289 expression is normal during late regeneration and we have ruled out elevated N

290 signaling as the causative factor for the cell-fate errors that occurred in *brat*<sup>1/+</sup>  
291 regenerating discs, we wondered whether high Myc levels caused by reduced Brat  
292 could cause the margin defects.

293

294 Brat overexpression can suppress Myc in wing imaginal disc cells (Ferreira et al., 2014),  
295 and in undamaged wing discs Brat protein levels were elevated at the DV boundary  
296 where Myc was reduced (Figure 5A and 5A'), suggesting that Brat may regulate Myc at  
297 the DV boundary. Furthermore, our results showed that regenerating *brat*<sup>1/+</sup> mutant  
298 discs experienced elevated Myc levels compared to controls (Figure 3G-K). Previous  
299 studies demonstrated that Brat regulates Myc at the post-transcriptional level (Ferreira  
300 et al., 2014). To confirm that Brat is also regulating *myc* post-transcriptionally during  
301 regeneration, we measured *myc* transcript levels through qPCR. Regenerating discs  
302 showed significantly increased transcription of *myc* compared to undamaged controls.  
303 However, there was no significant difference in *myc* transcript levels between  
304 regenerating control and *brat*<sup>1/+</sup> discs at R0 and R24 (Figure 5B and 5C), indicating that  
305 Brat's regulation of Myc must be post-transcriptional.

306

307 To test whether the elevated Myc protein levels could cause margin defects during  
308 regeneration and phenocopy the *brat* mutation, we overexpressed Myc in the wing  
309 pouch during the 24-hour ablation period. Myc was highly upregulated at R0 (Figure 5D-  
310 F), but Myc levels had returned to normal by R24 (Figure 5F). Overexpression of Myc  
311 also resulted in a significantly higher number of proliferating nuclei in the regenerating

312 tissue at R0, similar to *brat<sup>1/+</sup>* discs (Figure 5G-I). Remarkably, we observed that adult  
313 wings resulting from Myc-overexpressing regenerating discs also showed margin  
314 defects similar to the *brat<sup>1/+</sup>* wings (Figure 5J and 5K). Moreover, the frequency of  
315 margin defects in the adult wings resulting from Myc-overexpressing regenerating discs  
316 was even higher than in adult wings resulting from *brat<sup>1/+</sup>* regenerating discs (Figure  
317 5L), demonstrating that elevated levels of Myc alone can cause errors in margin cell-  
318 fate specification. Similar to *brat<sup>1/+</sup>* discs, *ap-lacZ* expression showed that the  
319 compartment boundary was not compromised in Myc-overexpressing regenerating  
320 discs (Figure 5M and 5N). Likewise, Ct expression was missing in segments at the DV  
321 boundary as in the *brat<sup>1/+</sup>* discs (Figure 5O and 5P).

322

323 Overexpressing Myc for a 24-hour window during normal development resulted in 3  
324 adult wings out of 730 that showed any margin defects (Figure S5A). Even in these  
325 wings, only one segment of the margin was affected. To rule out the possibility that  
326 transient overexpression of Myc during development may not be sufficient to perturb  
327 patterning, we overexpressed Myc continuously after the animals entered the third  
328 instar larval stage. Continuous Myc overexpression proved to be lethal for many  
329 animals. While the flies that survived had significantly smaller wings, the margins  
330 showed no defect (Figure 5Q and 5R). 31 hours of Myc overexpression during normal  
331 development showed significantly higher Myc protein levels (Figure 5S-U) but did not  
332 interfere with Ct expression (Figure 5V and 5W). These data indicate that high Myc  
333 levels do not cause cell-fate specification errors during normal development, and the



334 extensive loss of wing margin induced by high Myc expression is a regeneration-specific  
335 phenotype.

336

337 We hypothesized that if the *brat* phenotype was due to elevated Myc levels, we would  
338 be able to rescue the phenotype by reducing Myc levels in the *brat* mutant. For this  
339 purpose, we used *dm<sup>4</sup>*, which is a null allele of Myc (Pierce et al., 2004). Surprisingly,  
340 we observed that the *dm<sup>4</sup>/+* mutants alone showed margin defects in the regenerated  
341 wings at a frequency similar to *brat<sup>1</sup>/+*, even though the *dm<sup>4</sup>/+; brat<sup>1</sup>/+* double mutant  
342 showed slightly reduced frequency of margin defects (Figure S5B). To confirm that Myc  
343 levels were reduced in the *dm<sup>4</sup>/+* mutants, we quantified Myc protein through  
344 immunostaining. We observed that there was no significant difference in Myc  
345 expression levels between the *dm<sup>4</sup>/+* mutant and control, both during development and  
346 regeneration (Figure S5C and S5D). Indeed, Myc levels were trending higher in the  
347 *dm<sup>4</sup>/+* discs during regeneration. The failure of the *dm<sup>4</sup>* mutation to reduce Myc levels  
348 could be due to compensatory expression of the functional copy of the Myc locus. We  
349 next tried reducing Myc levels through RNAi. Despite the RNAi expression being  
350 transient in our system, and only occurring in cells that survive ablation, RNAi-mediated  
351 persistent knockdown has worked for multiple genes, likely due to the shadow RNAi  
352 effect (Bosch et al., 2016). Two RNAi lines could significantly reduce Myc levels during  
353 normal development when expressed during early third instar (Figure S5E). However,  
354 when Myc RNAi was expressed during the 24-hour ablation period, Myc levels were not  
355 reduced at either R0 or R24, with one Myc RNAi line showing significantly higher levels  
356 of Myc compared to the control (Figure S5F). Thus, compensatory regulation of Myc

357 expression during regeneration prevented us from testing whether reduction in Myc  
358 could rescue the *brat*/+ phenotype.

359

360 Interestingly, animals that overexpressed Myc in the wing pouch during ablation did not  
361 undergo a regeneration-induced pupariation delay (Figure S5G), suggesting that Brat  
362 regulates the entry into metamorphosis independently of its regulation of Myc.  
363 Therefore, not all effects of loss of Brat are mediated through Myc.

364

365 **Enhanced proliferation does not disrupt margin cell-fate specification during**  
366 **regeneration**

367 Myc is an important driver of regenerative growth, and yet, we found that cell-fate  
368 specification during regeneration can be negatively affected if Myc levels are not  
369 constrained. To test whether the aberrant patterning was a specific result of high Myc  
370 levels or whether increases in growth and proliferation could, in general, cause margin  
371 defects, we also increased proliferation during regeneration by overexpressing both  
372 *cyclinE* (*cycE*) and *string* (*stg*).

373

374 Overexpressing the cell cycle genes in the wing imaginal disc during the 24-hour  
375 ablation period caused the resulting adult wings to be much larger than controls that  
376 had also undergone damage and regeneration (Figure 6A), though not larger than a  
377 normal wing. No significant regeneration-induced pupariation delay was seen, making

378 the enhanced regeneration even more remarkable (Figure 6B). Intriguingly, we did not  
379 observe many margin defects for wings that had experienced *cycE* and *stg*  
380 overexpression during regeneration (Figure 6C-E). Thus, pattern disruption during  
381 regeneration appears to be specifically associated with Myc overexpression and does  
382 not appear to be caused by increased proliferation alone.

383

#### 384 **Loss of cell-fate specification may be due to elevated expression of Chinmo**

385 Given that driving growth by overexpressing Cyclin E and String does not cause loss of  
386 wing margin cell fates in regenerating tissue, this phenotype might be caused by  
387 misregulation of one or more targets of the Myc transcription factor. We have previously  
388 identified the gene *Chronologically inappropriate morphogenesis (chinmo)* as a novel  
389 regulator of regeneration (Khan et al., 2017). Chinmo is a transcription factor that  
390 regulates the balance between a proliferative self-renewal state and a differentiated  
391 state in stem cells (Dillard et al., 2017; Flaherty et al., 2010). Recent work has shown  
392 that *chinmo* also maintains wing epithelial cells in an unspecified state during  
393 development by inhibiting *ct* expression, and enhances regenerative potential  
394 (Narbonne-Reveau and Maurange, 2019). While *chinmo* mRNA can be a direct Brat  
395 target (Loedige et al., 2015), *chinmo* is regulated at the level of transcription in the wing  
396 imaginal disc (Narbonne-Reveau and Maurange, 2019). Therefore, we wondered  
397 whether *chinmo* could be misregulated downstream of Myc in the *brat<sup>1/+</sup>* regenerating  
398 discs. Interestingly, the model organism Encyclopedia of Regulatory Networks  
399 (modERN) data show Myc binding near the *chinmo* promoter, supporting this

400 hypothesis (Kudron et al., 2017). Chinmo levels were not significantly different in  
401 undamaged control and *brat*<sup>1/+</sup> discs (Figure 7A, 7B and 7E). However, Chinmo levels  
402 were significantly higher in *brat*<sup>1/+</sup> regenerating discs compared to control regenerating  
403 discs at R24 (Figure 7C, 7D and 7F). Thus, the loss of *ct* expression and loss of margin  
404 cell fates in *brat*<sup>1/+</sup> regenerating discs may be due, at least in part, to upregulation of  
405 *chinmo*.

406

407 To confirm regulation of *chinmo* downstream of Myc, we examined Chinmo levels in  
408 regenerating discs over-expressing Myc. Chinmo levels were elevated in Myc-  
409 overexpressing discs at R0, when Myc overexpression was the highest (Figure 5F and  
410 Figure 7G-I). However, Chinmo levels were restored to control levels by R24 in Myc-  
411 overexpressing discs, consistent with the return of Myc levels to normal at this time  
412 point (Figure 5F and Figure S6A-C). Interestingly, Myc and Chinmo expression almost  
413 perfectly co-localized, consistent with the hypothesis that Myc regulates Chinmo  
414 expression (Figure S6A-B"). Additionally, we observed a high correlation between Myc  
415 and Chinmo expression levels in individual discs (Figure S6D and S6E). Undamaged  
416 discs overexpressing Myc did not show elevated Chinmo levels (Figure S6F-H),  
417 possibly explaining why Myc overexpression during normal development did not cause  
418 margin defects. Importantly, other unidentified Myc targets may also contribute to *ct*  
419 misregulation in regenerating discs with reduced Brat or overexpressed Myc.

420

421 Based on our findings, we propose a model in which pro-growth factors are important  
422 for coordinating regenerative growth, but can lead to deleterious side effects by  
423 perturbing cell-fate gene expression and patterning. Brat prevents a prolonged  
424 proliferative and unspecified state in regenerating wing discs by inhibiting Wg, Ilp8, Myc  
425 and Chinmo to enable cessation of growth, induction of cell-fate specification, and entry  
426 into metamorphosis (Figure 8).

427

## 428 **Discussion**

429 Here we have shown that Brat acts as a protective factor during regeneration by  
430 constraining levels of transcription factors such as Myc and Chinmo, which promote  
431 growth and proliferation but also inhibit cell-fate specification. If Brat is unable to  
432 perform its protective function during regeneration, Myc levels increase unchecked,  
433 resulting in misregulation of its targets, including Chinmo and subsequently Ct, causing  
434 loss of proper cell fates at the wing margin.

435

436 Myc is broadly used across organisms to promote proliferation and prevent  
437 differentiation (Amati and Land, 1994; Takahashi and Yamanaka, 2006), and Myc is  
438 strongly activated in the regenerating wing imaginal discs and is required for efficient  
439 regeneration. Importantly, increased Myc levels can enhance regeneration in both  
440 younger discs as well as mature discs that normally regenerate poorly (Harris et al.,  
441 2016; Smith-Bolton et al., 2009). Nevertheless, we have found that while these  
442 abnormally high Myc levels can enhance regenerative growth, they also perturb

443 differentiation by misregulating target genes such as Chinmo. Thus, enhanced  
444 regeneration happens at the expense of correct cell-fate specification.

445

446 Brat promotes differentiation in *Drosophila* larval neuroblasts and ovarian germline stem  
447 cells by asymmetrically segregating to one of the daughter cells where it post-  
448 transcriptionally inhibits Myc (Betschinger et al., 2006; Harris et al., 2011). This  
449 daughter cell is then able to differentiate while the other daughter cell remains a stem  
450 cell. In *brat* mutants, progeny of stem cells are unable to differentiate, resulting in an  
451 abnormal expansion of the stem-cell population, which can form tumors in the brain  
452 (Arama et al., 2000; Betschinger et al., 2006; Harris et al., 2011; Lee et al., 2006). Thus,  
453 Brat protects these tissues from overproliferation of stem cells. Importantly, wing  
454 imaginal disc regeneration is not stem-cell based, but in wing disc regeneration Brat  
455 also inhibits Myc to allow correct cell-fate specification. Based on these similarities in  
456 function, Brat likely acts as a protective factor across different biological contexts,  
457 including regeneration that does not employ stem cells.

458

459 We have previously shown that JNK signaling can induce posterior-to-anterior fate  
460 changes in regenerating wing discs, which can be prevented by the protective factor  
461 Taranis (Schuster and Smith-Bolton, 2015). We have now identified a second protective  
462 factor, Brat, which is needed specifically for correct patterning of the regenerating wing  
463 margin. Interestingly, while elevated JNK signaling causes anterior markers to appear in  
464 the posterior wing compartment, it does not cause margin loss, indicating that posterior

465 fate and margin fate are regulated in distinct ways (Schuster and Smith-Bolton, 2015).  
466 Protective factors such as Tara and Brat are important for maintaining the balance  
467 between fate specification and regenerative potential, but they do so by using very  
468 different mechanisms. While the molecular function of Tara is unknown, genetic  
469 interactions in *Drosophila* coupled with the demonstrated functions of its vertebrate  
470 homologs suggest it regulates gene expression at the level of transcription and  
471 chromatin (Calgaro et al., 2002; Hayashi et al., 2006; Hsu et al., 2001; Watanabe-  
472 Fukunaga et al., 2005). By contrast, Brat acts as a translational repressor, and  
473 suppresses its targets through mRNA degradation (Komori et al., 2018; Laver et al.,  
474 2015). Tara is required to prevent fate changes induced by JNK signaling, which is  
475 necessary for wound repair and regeneration but is not required for the normal  
476 development of the wing. By contrast, Myc is required for both development and  
477 regeneration of the wing disc, but is constrained by Brat only during regeneration.

478

479 An important open question in the field of regeneration is how patterning and cell-fate  
480 specification are regulated in regenerating tissue, and whether these mechanisms are  
481 different from the developmental program. Many studies have highlighted that  
482 regeneration must be distinct from development in some ways, because the damaged  
483 tissue already has complex patterning, and the wound-healing response causes strong  
484 activation of signaling pathways, some of which are not normally present in developing  
485 tissue (Bosch et al., 2010, 2005; Harris et al., 2016; Luttrell et al., 2016; McCusker and  
486 Gardiner, 2013; Myohara, 2004; Schuster and Smith-Bolton, 2015; Sun and Irvine,  
487 2014; Vizcaya-Molina et al., 2018). We are just beginning to identify regulators like Brat

488 that are crucial for attenuating regenerative growth signaling and shielding the  
489 regenerating tissue from the harmful side effects of such signaling. Identification of  
490 these regulators highlights the fact that the regenerating tissue is distinct from normally  
491 developing tissue. Since regeneration signaling is complex and comprised of many  
492 signaling pathways, additional factors that play protective roles during regeneration  
493 likely exist. Identification of these factors will be important for the development of clinical  
494 therapies targeted at tissue repair, enabling these therapies to protect against the  
495 deleterious side effects of exogenous and unconstrained pro-growth signaling.

496

## 497 **Materials and Methods**

### 498 **Ablation and Regeneration experiments**

499 Ablation experiments were done as previously described (Schuster and Smith-Bolton,  
500 2015). Briefly, cell death was induced by driving *UAS-reaper* under *rotund-GAL4*, with  
501 *GAL80<sup>ts</sup>* for temporal control. Animals were raised at 18°C for 7 days after egg lay (AEL)  
502 (early third instar) before they were shifted to a 30°C circulating water bath for 24 hours.  
503 Animals were brought back to 18°C to allow regeneration. Wing discs were dissected at  
504 different time points after the end of ablation, or the animals were allowed to grow to  
505 adulthood to observe the adult wing phenotype. Undamaged control wing discs were  
506 the same genotype as the experimental animals but kept at 18°C and dissected on day  
507 9 after egg lay, which is mid-late third instar. For undamaged adult wings, the animals  
508 were kept at 18°C until after eclosion. Any other undamaged conditions used are  
509 mentioned specifically in the figure legends.



510

## 511 **Fly stocks**

512 The following *Drosophila* stocks were used: *w<sup>1118</sup>* (wild type)(Hazelrigg et al., 1984),  
513 *w<sup>1118</sup>* ; *rnGAL4*, *UAS-rpr*, *tubGAL80ts/TM6B*, *tubGAL80* (Smith-Bolton et al., 2009), *brat<sup>1</sup>*  
514 (Wright et al., 1976)(FBst0003988), *brat<sup>192</sup>* and *brat<sup>150</sup>* (Luschnig et al., 2004)(a gift from  
515 Juergen Knoblich, Austrain Academy of Science), *brat<sup>11</sup>* (Wright et al., 1981)(a gift from  
516 Chen-Yu Lee, University of Michigan), *Df(2L)Exel8040* (Parks et al.,  
517 2004)(FBst0007847), *Df(2L)TE37C-7* (Stathakis et al., 1995)(FBst0006089), *rnGAL4*,  
518 *tubGAL80ts/TM6B* (Smith-Bolton et al., 2009), *P{Trip.HM05078}attP2* (called *bratRNAi*  
519 in the text)(FBst0028590), *P{CaryP}attP2* (called *attP2* control in the  
520 text)(FBst0036303), *{PZ}ap<sup>rK568</sup>* (Cohen et al., 1992)(FBst0005374), *NRE-GFP* (Saj et  
521 al., 2010)(FBst0030727), *UAS-Nintra* (a gift from Gary Struhl, Columbia University),  
522 *aph-1<sup>D35</sup>* (Littleton and Bellen, 1994)(FBst0063242), *UAS-Myc* (Johnston et al., 1999)  
523 (FBst0009674), *UAS-cycE*, *stg* (a gift from Laura Buttitta, University of Michigan), *dm<sup>4</sup>*  
524 (Pierce et al., 2004), *P{GD1419}v2947* (called *MycRNAi#1* in the text)(VDRC ID# 2947)  
525 and *P{GD1419}v2948* (called *MycRNAi#2* in the text)(VDRC ID# 2948),  
526 *P{GD6000}v15293* (called control in the text) (VDRC ID# 15293)(93). All fly stocks are  
527 available from the Bloomington Drosophila Stock Center unless stated otherwise.

528

## 529 **Pupariation timing**

530 Pupariation experiments were performed in a similar manner to the ablation  
531 experiments. Starting at day 9, newly formed pupal cases were counted in each vial.

532 Pupal cases were counted every 24 hours, up until day 15. Pupariation rates from three  
533 independent experiments were used to calculate the average plotted in the graphs.

534

### 535 **Immunohistochemistry**

536 Immunostaining was carried out as previously described (Smith-Bolton et al., 2009).  
537 Primary antibodies were rat anti-Brat (1:200) (Sonoda and Wharton, 2001) (a gift from  
538 Robin Wharton, Ohio State University), mouse anti-Nubbin (1:500) (Averof and Cohen,  
539 1997) (a gift from Steve Cohen, University of Copenhagen), rabbit anti-Phospho-  
540 Histone H3 (1:500) (Millipore), mouse anti-Wingless (1:100) (The Developmental  
541 Studies Hybridoma Bank [DSHB]), rabbit anti-dMyc (1:500) (Santa Cruz  
542 Biotechnologies), mouse anti- $\beta$ gal (1:100) (DSHB), mouse anti-Cut (1:10) (DSHB),  
543 mouse anti-Achaete (1:10)(DSHB), rat anti-Chinmo (1:500) (a gift from Nick Sokol,  
544 Indiana University). The Developmental Studies Hybridoma Bank (DSHB) was created  
545 by the NICHD of the NIH and is maintained at the University of Iowa, Department of  
546 Biology, Iowa City, IA 52242.

547

548 Secondary antibodies were AlexaFluor probes (1:1000) (Life Technologies). DNA was  
549 marked using TO-PRO3 (1:500) (Life Technologies) or DAPI (1:5000 of 0.5 mg/mL  
550 stock) (Sigma). Discs were mounted in Vectashield mounting medium (Vector  
551 Laboratories).

552

553 Discs were imaged on a Zeiss LSM 510 or a Zeiss LSM 700 confocal microscope.  
554 Parameters for imaging were identical for quantified images. Images were processed  
555 using ZEN lite (Zeiss), ImageJ (NIH) and Photoshop (Adobe). Maximum intensity  
556 projections were created for the confocal images. Fluorescence intensity was measured  
557 within the wing pouch as marked by anti-Nubbin or by using the morphology of the  
558 undamaged wing disc. Myc and Chinmo intensities were measure by outlining the  
559 region expressing elevated Myc or Chinmo levels. *NRE-GFP* intensity was measured by  
560 outlining the GFP-expressing region at the DV boundary.

561

#### 562 **Adult wing quantifications**

563 Adult wings were mounted in Gary's Magic Mount (Canada balsam [Sigma] dissolved in  
564 methyl salicylate [Sigma]). Images were taken with an Olympus SZX10 microscope with  
565 an Olympus DP21 camera using the CellSens Dimension software (Olympus).

566

567 All adult wings that were 75% or 100% the size of a normal wing were used to quantify  
568 the loss of the wing margin. The wing margin was divided into five segments defined by  
569 where the wing veins intersect the margin. Each wing was scored for the number of  
570 segments with missing margin to assess the extent of the patterning defect.

571 Percentages from the three independent experiments were used to calculate averages  
572 plotted in the graphs. The area of undamaged and regenerated wings was measured  
573 using ImageJ (NIH). ImageJ was also used to measure the percentage of linear length  
574 of margin lost for the entire perimeter of the wing. Graphs were plotted using Excel and  
575 Graphpad Prism 7.

576

## 577 **qPCR**

578 For quantitative PCR (qPCR), 40-60 wing imaginal discs were collected in Schneider's  
579 medium and stored at -80°C. RNA was extracted using the Qiagen RNeasy Mini Kit  
580 (#74104), and cDNA synthesis was performed using the Superscript III First Strand  
581 Synthesis kit (#11752-050). qPCR reactions using the Power SYBR Green MasterMix  
582 (ABI) were run on the ABI Step One Plus Real Time PCR System. The experiment  
583 consisted of 3 biological replicates. For each biological replicate there were three  
584 technical replicates. Gene expression was analyzed by the  $\Delta\Delta C_t$  method and  
585 normalized to *Gapdh2* expression. The following primers were used: *Gapdh2* forward  
586 primer (GTGAAGCTGATCTCTTGGTACGAC), *Gapdh2* reverse primer  
587 (CCGCGCCCTAATCTTTAACTTTTAC) (Classen et al., 2009), *ilp8* primers used from  
588 Qiagen (QT00510552), *dmyc* forward primer (AACGATATGGTGGACGATGG), and  
589 *dmyc* reverse primer (CGGCAGATTGAAGTTATTGTAGC) (Mitchell et al., 2010). For  
590 qPCR experiments undamaged controls were *rnGAL4*, *tubGAL80ts/TM6B* females  
591 crossed to *w<sup>1118</sup>* males and shifted to 30°C for 24 hours at 7 days AEL. Discs were  
592 dissected either immediately or 24 hours after shifting the animals back to 18°C for R0  
593 and R24 time points, respectively.

594

## 595 **Acknowledgements**

596 The authors would like to thank Amanda Brock and Sumbul Khan for critical reading of  
597 the manuscript and helpful discussions; Juergen Knoblich, Cheng-Yu Lee, Gary Struhl,

598 Robin Wharton, Nick Sokol, Laura Buttitta, the Bloomington Drosophila Stock Center  
599 (NIH P40OD018537), Vienna Drosophila Resource Center and the Developmental  
600 Studies Hybridoma Bank for reagents.

601

## 602 **Author Contribution Section**

603 Experiments were designed by SNFA and RKSB, and conducted and analyzed by  
604 SNFA. The manuscript was written by SNFA and RKSB.

605

## 606 **Competing interests**

607 The authors declare no competing interests.

608

## 609 **References**

610

611 Abbott LC, Karpen GH, Schubiger G. 1981. Compartmental restrictions and blastema  
612 formation during pattern regulation in Drosophila imaginal leg discs. *Dev Biol* **87**:64–75.  
613 doi:10.1016/0012-1606(81)90061-0

614

615 Amati B, Land H. 1994. Myc—Max—Mad: a transcription factor network controlling cell  
616 cycle progression, differentiation and death. *Curr Opin Genet Dev* **4**:102–108.  
617 doi:10.1016/0959-437x(94)90098-1

618

619 Arama E, Dickman D, Kimchie Z, Shearn A, Lev Z. 2000. Mutations in the  $\beta$ -propeller

620 domain of the Drosophila brain tumor (brat) protein induce neoplasm in the larval brain.

621 *Oncogene* **19**:1203706. doi:10.1038/sj.onc.1203706

622

623 Averof M, Cohen SM. 1997. Evolutionary origin of insect wings from ancestral gills.

624 *Nature* **385**:385627a0. doi:10.1038/385627a0

625

626 Bando T, Ishimaru Y, Kida T, Hamada Y, Matsuoka Y, Nakamura T, Ohuchi H, Noji S,

627 Mito T. 2013. Analysis of RNA-Seq data reveals involvement of JAK/STAT signalling

628 during leg regeneration in the cricket *Gryllus bimaculatus*. *Development* **140**:959–964.

629 doi:10.1242/dev.084590

630

631 Bando T, Mito T, Maeda Y, Nakamura T, Ito F, Watanabe T, Ohuchi H, Noji S. 2009.

632 Regulation of leg size and shape by the Dachshous/Fat signalling pathway during

633 regeneration. *Development* **136**:2235–2245. doi:10.1242/dev.035204

634

635 Becam I, Milán M. 2008. A permissive role of Notch in maintaining the DV affinity

636 boundary of the Drosophila wing. *Dev Biol* **322**:190–198.

637 doi:10.1016/j.ydbio.2008.07.028

638

639 Bergantiños C, Corominas M, Serras F. 2010. Cell death-induced regeneration in wing

640 imaginal discs requires JNK signalling. *Development* **137**:1169–1179.

641 doi:10.1242/dev.045559

642

- 643 Betschinger J, Mechtler K, Knoblich JA. 2006. Asymmetric Segregation of the Tumor  
644 Suppressor Brat Regulates Self-Renewal in Drosophila Neural Stem Cells. *Cell*  
645 **124**:1241–1253. doi:10.1016/j.cell.2006.01.038  
646
- 647 Bosch JA, Sumabat TM, Hariharan IK. 2016. Persistence of RNAi-Mediated Knockdown  
648 in Drosophila Complicates Mosaic Analysis Yet Enables Highly Sensitive Lineage  
649 Tracing. *Genetics* **203**:109–118. doi:10.1534/genetics.116.187062  
650
- 651 Bosch M, Bishop S-A, Baguña J, Couso J-P. 2010. Leg regeneration in Drosophila  
652 abridges the normal developmental program. *Int J Dev Biol* **54**:1241–1250.  
653 doi:10.1387/ijdb.093010mb  
654
- 655 Bosch M, Serras F, Martín-Blanco E, Baguña J. 2005. JNK signaling pathway required  
656 for wound healing in regenerating Drosophila wing imaginal discs. *Dev Biol* **280**:73–86.  
657 doi:10.1016/j.ydbio.2005.01.002  
658
- 659 Brock AR, Seto M, Smith-Bolton RK. 2017. Cap-n-Collar Promotes Tissue Regeneration  
660 by Regulating ROS and JNK Signaling in the Drosophila melanogaster Wing Imaginal  
661 Disc. *Genetics* **206**:1505–1520. doi:10.1534/genetics.116.196832  
662
- 663 Calgaro S, Boube M, Cribbs DL, Bourbon H-M. 2002. The Drosophila gene taranis  
664 encodes a novel trithorax group member potentially linked to the cell cycle regulatory  
665 apparatus. *Genetics* **160**:547–60.

666

667 Chen G, Kong J, Tucker-Burden C, Anand M, Rong Y, Rahman F, Moreno CS, Meir  
668 EG, Hadjipanayis CG, Brat DJ. 2014. Human Brat Ortholog TRIM3 Is a Tumor  
669 Suppressor That Regulates Asymmetric Cell Division in Glioblastoma. *Cancer Res*  
670 **74**:4536–4548. doi:10.1158/0008-5472.can-13-3703

671

672 Classen A-K, Bunker BD, Harvey KF, Vaccari T, Bilder D. 2009. A tumor suppressor  
673 activity of *Drosophila* Polycomb genes mediated by JAK-STAT signaling. *Nat Genet*  
674 **41**:1150–1155. doi:10.1038/ng.445

675

676 Cohen B, McGuffin M, Pfeifle C, Segal D, Cohen S. 1992. *apterous*, a gene required for  
677 imaginal disc development in *Drosophila* encodes a member of the LIM family of  
678 developmental regulatory proteins. *Gene Dev* **6**:715–729. doi:10.1101/gad.6.5.715

679

680 Colombani J, Andersen DS, Léopold P. 2012. Secreted Peptide Dilp8 Coordinates  
681 *Drosophila* Tissue Growth with Developmental Timing. *Science* **336**:582–585.  
682 doi:10.1126/science.1216689

683

684 Couso J, Bate M, Martinez-Arias A. 1993. A wingless-dependent polar coordinate  
685 system in *Drosophila* imaginal discs. *Science* **259**:484–489.  
686 doi:10.1126/science.8424170

687

688 Couso J, Bishop S, Arias MA. 1994. The wingless signalling pathway and the patterning



689 of the wing margin in *Drosophila*. *Dev Camb Engl* **120**:621–36.

690

691 Diaz-Benjumea FJ, Cohen SM. 1993. Interaction between dorsal and ventral cells in the  
692 imaginal disc directs wing development in *Drosophila*. *Cell* **75**:741–752.  
693 doi:10.1016/0092-8674(93)90494-b

694

695 Dillard C, Narbonne-Reveau K, Foppolo S, Lanet E, Maurange C. 2017. Two distinct  
696 mechanisms silence *chinmo* in *Drosophila* neuroblasts and neuroepithelial cells to limit  
697 their self-renewal. *Development* **145**:dev.154534. doi:10.1242/dev.154534

698

699 Fan Y, Wang S, Hernandez J, Yenigun V, Hertlein G, Fogarty CE, Lindblad JL,  
700 Bergmann A. 2014. Genetic Models of Apoptosis-Induced Proliferation Decipher  
701 Activation of JNK and Identify a Requirement of EGFR Signaling for Tissue  
702 Regenerative Responses in *Drosophila*. *Plos Genet* **10**:e1004131.  
703 doi:10.1371/journal.pgen.1004131

704

705 Ferreira A, Boulan L, Perez L, Milán M. 2014. Mei-P26 Mediates Tissue-Specific  
706 Responses to the Brat Tumor Suppressor and the dMyc Proto-Oncogene in *Drosophila*.  
707 *Genetics* **198**:249–258. doi:10.1534/genetics.114.167502

708

709 Flaherty M, Salis P, Evans CJ, Ekas LA, Marouf A, Zavadil J, Banerjee U, Bach EA.  
710 2010. *chinmo* Is a Functional Effector of the JAK/STAT Pathway that Regulates Eye  
711 Development, Tumor Formation, and Stem Cell Self-Renewal in *Drosophila*. *Dev Cell*

712 **18**:556–568. doi:10.1016/j.devcel.2010.02.006

713

714 Garelli A, Gontijo AM, Miguela V, Caparros E, Dominguez M. 2012. Imaginal Discs

715 Secrete Insulin-Like Peptide 8 to Mediate Plasticity of Growth and Maturation. *Science*

716 **336**:579–582. doi:10.1126/science.1216735

717

718 Grijalva JL, Huizenga M, Mueller K, Rodriguez S, Brazzo J, Camargo F, Sadri-Vakili G,

719 Vakili K. 2014. Dynamic alterations in Hippo signaling pathway and YAP activation

720 during liver regeneration. *Am J Physiol-gastr L* **307**:G196–G204.

721 doi:10.1152/ajpgi.00077.2014

722

723 Grusche FA, Degoutin JL, Richardson HE, Harvey KF. 2011. The Salvador/Warts/Hippo

724 pathway controls regenerative tissue growth in *Drosophila melanogaster*. *Dev Biol*

725 **350**:255–266. doi:10.1016/j.ydbio.2010.11.020

726

727 Gupta V, Gemberling M, Karra R, Rosenfeld GE, Evans T, Poss KD. 2013. An Injury-

728 Responsive Gata4 Program Shapes the Zebrafish Cardiac Ventricle. *Curr Biol* **23**:1221–

729 1227. doi:10.1016/j.cub.2013.05.028

730

731 Halme A, Cheng M, Hariharan IK. 2010. Retinoids Regulate a Developmental

732 Checkpoint for Tissue Regeneration in *Drosophila*. *Curr Biol* **20**:458–463.

733 doi:10.1016/j.cub.2010.01.038

734

- 735 Hanovice NJ, Leach LL, Slater K, Gabriel AE, Romanovicz D, Shao E, Collery R, Burton  
736 EA, Lathrop KL, Link BA, Gross JM. 2019. Regeneration of the zebrafish retinal pigment  
737 epithelium after widespread genetic ablation. *Plos Genet* **15**:e1007939.  
738 doi:10.1371/journal.pgen.1007939  
739
- 740 Hariharan IK, Serras F. 2017. Imaginal disc regeneration takes flight. *Curr Opin Cell Biol*  
741 **48**:10–16. doi:10.1016/j.ceb.2017.03.005  
742
- 743 Harris RE, Pargett M, Sutcliffe C, Umulis D, Ashe HL. 2011. Brat Promotes Stem Cell  
744 Differentiation via Control of a Bistable Switch that Restricts BMP Signaling. *Dev Cell*  
745 **20**:72–83. doi:10.1016/j.devcel.2010.11.019  
746
- 747 Harris RE, Setiawan L, Saul J, Hariharan IK. 2016. Localized epigenetic silencing of a  
748 damage-activated WNT enhancer limits regeneration in mature *Drosophila* imaginal  
749 discs. *Elife* **5**:e11588. doi:10.7554/elife.11588  
750
- 751 Hayashi R, Goto Y, Ikeda R, Yokoyama KK, Yoshida K. 2006. CDCA4 Is an E2F  
752 Transcription Factor Family-induced Nuclear Factor That Regulates E2F-dependent  
753 Transcriptional Activation and Cell Proliferation. *J Biol Chem* **281**:35633–35648.  
754 doi:10.1074/jbc.m603800200  
755
- 756 Hayashi S, Ochi H, Ogino H, Kawasumi A, Kamei Y, Tamura K, Yokoyama H. 2014.  
757 Transcriptional regulators in the Hippo signaling pathway control organ growth in

- 758 *Xenopus* tadpole tail regeneration. *Dev Biol* **396**:31–41.
- 759 doi:10.1016/j.ydbio.2014.09.018
- 760
- 761 Hazelrigg T, Levis R, Rubin GM. 1984. Transformation of white locus DNA in
- 762 *Drosophila*: Dosage compensation, zeste interaction, and position effects. *Cell* **36**:469–
- 763 481. doi:10.1016/0092-8674(84)90240-x
- 764
- 765 Hobmayer B, Rentzsch F, Kuhn K, Happel CM, von Laue C, Snyder P, Rothbacher U,
- 766 Holstein TW. 2000. WNT signalling molecules act in axis formation in the diploblastic
- 767 metazoan *Hydra*. *Nature* **407**:186. doi:10.1038/35025063
- 768
- 769 Hsu S, Yang C, Sim K, Hentschel DM, O’Leary E, Bonventre JV. 2001. TRIP-Br: a novel
- 770 family of PHD zinc finger- and bromodomain-interacting proteins that regulate the
- 771 transcriptional activity of E2F-1/DP-1. *Embo J* **20**:2273–2285.
- 772 doi:10.1093/emboj/20.9.2273
- 773
- 774 Jack J, Dorsett D, Delotto Y, Liu S. 1991. Expression of the cut locus in the *Drosophila*
- 775 wing margin is required for cell type specification and is regulated by a distant
- 776 enhancer. *Dev Camb Engl* **113**:735–47.
- 777
- 778 Jiang H, Grenley MO, Bravo M-J, Blumhagen RZ, Edgar BA. 2011. EGFR/Ras/MAPK
- 779 Signaling Mediates Adult Midgut Epithelial Homeostasis and Regeneration in
- 780 *Drosophila*. *Cell Stem Cell* **8**:84–95. doi:10.1016/j.stem.2010.11.026

781

782 Jin Y, Ha N, Forés M, Xiang J, Gläßer C, Maldera J, Jiménez G, Edgar BA. 2015.

783 EGFR/Ras Signaling Controls Drosophila Intestinal Stem Cell Proliferation via Capicua-

784 Regulated Genes. *Plos Genet* **11**:e1005634. doi:10.1371/journal.pgen.1005634

785

786 Johnston LA, Prober DA, Edgar BA, Eisenman RN, Gallant P. 1999. Drosophila myc

787 Regulates Cellular Growth during Development. *Cell* **98**:779–790. doi:10.1016/s0092-

788 8674(00)81512-3

789

790 Katsuyama T, Comoglio F, Seimiya M, Cabuy E, Paro R. 2015. During Drosophila disc

791 regeneration, JAK/STAT coordinates cell proliferation with Dilp8-mediated

792 developmental delay. *Proc National Acad Sci* **112**:E2327–E2336.

793 doi:10.1073/pnas.1423074112

794

795 Kawakami Y, Esteban C, Raya M, Kawakami H, Martí M, Dubova I, Belmonte J. 2006.

796 Wnt/ $\beta$ -catenin signaling regulates vertebrate limb regeneration. *Gene Dev* **20**:3232–

797 3237. doi:10.1101/gad.1475106

798

799 Khan S, Abidi S, Skinner A, Tian Y, Smith-Bolton RK. 2017. The Drosophila Duox

800 maturation factor is a key component of a positive feedback loop that sustains

801 regeneration signaling. *Plos Genet* **13**:e1006937. doi:10.1371/journal.pgen.1006937

802

803 Komori H, Golden KL, Kobayashi T, Kageyama R, Lee C-Y. 2018. Multilayered gene

804 control drives timely exit from the stem cell state in uncommitted progenitors during  
805 *Drosophila* asymmetric neural stem cell division. *Gene Dev* **32**:1550–1561.  
806 doi:10.1101/gad.320333.118  
807  
808 Komori H, Xiao Q, McCartney BM, Lee C-Y. 2014. Brain tumor specifies intermediate  
809 progenitor cell identity by attenuating  $\beta$ -catenin/Armadillo activity. *Development* **141**:51–  
810 62. doi:10.1242/dev.099382  
811  
812 Kudron MM, Victorsen A, Gevirtzman L, Hillier LW, Fisher WW, Vafeados D, Kirkey M,  
813 Hammonds AS, Gersch J, Ammouri H, Wall ML, Moran J, Steffen D, Szykarek M,  
814 Seabrook-Sturgis S, Jameel N, Kadaba M, Patton J, Terrell R, Corson M, Durham TJ,  
815 Park S, Samanta S, Han M, Xu J, Yan K-K, Celniker SE, White KP, Ma L, Gerstein M,  
816 Reinke V, Waterston R. 2017. The modERN Resource: Genome-Wide Binding Profiles  
817 for Hundreds of *Drosophila* and *Caenorhabditis elegans* Transcription Factors. *Genetics*  
818 **208**:genetics.300657.2017. doi:10.1534/genetics.117.300657  
819  
820 Kudryashova E, Kramerova I, Spencer MJ. 2012. Satellite cell senescence underlies  
821 myopathy in a mouse model of limb-girdle muscular dystrophy 2H. *J Clin Invest*  
822 **122**:1764–1776. doi:10.1172/jci59581  
823  
824 Laver JD, Li X, Ray D, Cook KB, Hahn NA, Nabeel-Shah S, Kekis M, Luo H, Marsolais  
825 AJ, Fung KY, Hughes TR, Westwood TJ, Sidhu SS, Morris Q, Lipshitz HD, Smibert CA.  
826 2015. Brain tumor is a sequence-specific RNA-binding protein that directs maternal

827 mRNA clearance during the *Drosophila* maternal-to-zygotic transition. *Genome Biol*  
828 **16**:94. doi:10.1186/s13059-015-0659-4  
829  
830 Lee C-Y, Wilkinson BD, Siegrist SE, Wharton RP, Doe CQ. 2006. Brat Is a Miranda  
831 Cargo Protein that Promotes Neuronal Differentiation and Inhibits Neuroblast Self-  
832 Renewal. *Dev Cell* **10**:441–449. doi:10.1016/j.devcel.2006.01.017  
833  
834 Littleton J, Bellen H. 1994. Genetic and phenotypic analysis of thirteen essential genes  
835 in cytological interval 22F1-2; 23B1-2 reveals novel genes required for neural  
836 development in *Drosophila*. *Genetics* **138**:111–23.  
837  
838 Loedige I, Jakob L, Treiber T, Ray D, Stotz M, Treiber N, Hennig J, Cook KB, Morris Q,  
839 Hughes TR, Engelmann JC, Krahn MP, Meister G. 2015. The Crystal Structure of the  
840 NHL Domain in Complex with RNA Reveals the Molecular Basis of *Drosophila* Brain-  
841 Tumor-Mediated Gene Regulation. *Cell Reports* **13**:1206–1220.  
842 doi:10.1016/j.celrep.2015.09.068  
843  
844 Loedige I, Stotz M, Qamar S, Kramer K, Hennig J, Schubert T, Löffler P, Längst G,  
845 Merkl R, Urlaub H, Meister G. 2014. The NHL domain of BRAT is an RNA-binding  
846 domain that directly contacts the hunchback mRNA for regulation. *Gene Dev* **28**:749–  
847 764. doi:10.1101/gad.236513.113  
848  
849 Luschnig S, Moussian B, Krauss J, Desjeux I, Perkovic J, Nüsslein-Volhard C. 2004. An

850 F1 Genetic Screen for Maternal-Effect Mutations Affecting Embryonic Pattern Formation  
851 in *Drosophila melanogaster*. *Genetics* **167**:325–342. doi:10.1534/genetics.167.1.325  
852  
853 Luttrell SM, Gotting K, Ross E, Alvarado A, Swalla BJ. 2016. Head regeneration in  
854 hemichordates is not a strict recapitulation of development. *Dev Dynam* **245**:1159–  
855 1175. doi:10.1002/dvdy.24457  
856  
857 Mader MM, Cameron DA. 2004. Photoreceptor Differentiation during Retinal  
858 Development, Growth, and Regeneration in a Metamorphic Vertebrate. *J Neurosci*  
859 **24**:11463–11472. doi:10.1523/jneurosci.3343-04.2004  
860  
861 Martín R, Pinal N, Morata G. 2017. Distinct regenerative potential of trunk and  
862 appendages of *Drosophila* mediated by JNK signalling. *Development* **144**:dev.155507.  
863 doi:10.1242/dev.155507  
864  
865 McClure KD, Schubiger G. 2008. A screen for genes that function in leg disc  
866 regeneration in *Drosophila melanogaster*. *Mech Develop* **125**:67–80.  
867 doi:10.1016/j.mod.2007.10.003  
868  
869 McCusker CD, Gardiner DM. 2013. Positional Information Is Reprogrammed in  
870 Blastema Cells of the Regenerating Limb of the Axolotl (*Ambystoma mexicanum*). *Plos*  
871 *One* **8**:e77064. doi:10.1371/journal.pone.0077064  
872



- 873 Micchelli C, Rulifson E, Blair S. 1997. The function and regulation of cut expression on  
874 the wing margin of *Drosophila*: Notch, Wingless and a dominant negative role for Delta  
875 and Serrate. *Dev Camb Engl* **124**:1485–95.
- 876 Mitchell NC, Johanson TM, Cranna NJ, Er ALJ, Richardson HE, Hannan RD, Quinn LM.  
877 2010. Hfp inhibits *Drosophila* myc transcription and cell growth in a TFIID/Hay-  
878 dependent manner. *Development* **137**:2875–2884. doi:10.1242/dev.049585  
879
- 880 Mukherjee S, Tucker-Burden C, Zhang C, Moberg K, Read R, Hadjipanayis C, Brat DJ.  
881 2016. *Drosophila* Brat and Human Ortholog TRIM3 Maintain Stem Cell Equilibrium and  
882 Suppress Brain Tumorigenesis by Attenuating Notch Nuclear Transport. *Cancer Res*  
883 **76**:2443–2452. doi:10.1158/0008-5472.can-15-2299  
884
- 885 Muneoka K, Bryant SV. 1982. Evidence that patterning mechanisms in developing and  
886 regenerating limbs are the same. *Nature* **298**:298369a0. doi:10.1038/298369a0  
887
- 888 Myohara M. 2004. Differential tissue development during embryogenesis and  
889 regeneration in an annelid. *Dev Dynam* **231**:349–358. doi:10.1002/dvdy.20115  
890
- 891 Nakamura T, Mito T, Bando T, Ohuchi H, Noji S. 2007. Molecular and Cellular Basis of  
892 Regeneration and Tissue Repair. *Cell Mol Life Sci* **65**:64. doi:10.1007/s00018-007-  
893 7432-0  
894
- 895 Narbonne-Reveau K, Maurange C. 2019. Developmental regulation of regenerative

896 potential in *Drosophila* by ecdysone through a bistable loop of ZBTB transcription  
897 factors. *Plos Biol* **17**:e3000149. doi:10.1371/journal.pbio.3000149  
898  
899 Ng M, Diaz-Benjumea F, Cohen S. 1995. Nubbin encodes a POU-domain protein  
900 required for proximal-distal patterning in the *Drosophila* wing. *Dev Camb Engl* **121**:589–  
901 99.  
902  
903 Nicklas S, Otto A, Wu X, Miller P, Stelzer S, Wen Y, Kuang S, Wrogemann K, Patel K,  
904 Ding H, Schwamborn JC. 2012. TRIM32 Regulates Skeletal Muscle Stem Cell  
905 Differentiation and Is Necessary for Normal Adult Muscle Regeneration. *Plos One*  
906 **7**:e30445. doi:10.1371/journal.pone.0030445  
907  
908 Parks AL, Cook KR, Belvin M, Dompe NA, Fawcett R, Huppert K, Tan LR, Winter CG,  
909 Bogart KP, Deal JE, Deal-Herr ME, Grant D, Marcinko M, Miyazaki WY, Robertson S,  
910 Shaw KJ, Tabios M, Vysotskaia V, Zhao L, Andrade RS, Edgar KA, Howie E, Killpack K,  
911 Milash B, Norton A, Thao D, Whittaker K, Winner MA, Friedman L, Margolis J, Singer  
912 MA, Kopczynski C, Curtis D, Kaufman TC, Plowman GD, Duyk G, Francis-Lang HL.  
913 2004. Systematic generation of high-resolution deletion coverage of the *Drosophila*  
914 *melanogaster* genome. *Nat Genet* **36**:ng1312. doi:10.1038/ng1312  
915  
916 Pierce SB, Yost C, Britton JS, Loo LW, Flynn EM, Edgar BA, Eisenman RN. 2004. dMyc  
917 is required for larval growth and endoreplication in *Drosophila*. *Development* **131**:2317–  
918 2327. doi:10.1242/dev.01108

919

920 Roensch K, Tazaki A, Chara O, Tanaka EM. 2013. Progressive Specification Rather  
921 than Intercalation of Segments During Limb Regeneration. *Science* **342**:1375–1379.

922 doi:10.1126/science.1241796

923

924 Saj A, Arziman Z, Stempfle D, van Belle W, Sauder U, Horn T, Dürrenberger M, Paro R,  
925 Boutros M, Merdes G. 2010. A Combined Ex Vivo and In Vivo RNAi Screen for Notch  
926 Regulators in *Drosophila* Reveals an Extensive Notch Interaction Network. *Dev Cell*

927 **18**:862–876. doi:10.1016/j.devcel.2010.03.013

928

929 Schubiger M, Sustar A, Schubiger G. 2010. Regeneration and transdetermination: The  
930 role of wingless and its regulation. *Dev Biol* **347**:315–324.

931 doi:10.1016/j.ydbio.2010.08.034

932

933 Schuster KJ, Smith-Bolton RK. 2015. Taranis Protects Regenerating Tissue from Fate  
934 Changes Induced by the Wound Response in *Drosophila*. *Dev Cell* **34**:119–128.

935 doi:10.1016/j.devcel.2015.04.017

936

937 Schwamborn JC, Berezikov E, Knoblich JA. 2009. The TRIM-NHL Protein TRIM32  
938 Activates MicroRNAs and Prevents Self-Renewal in Mouse Neural Progenitors. *Cell*

939 **136**:913–925. doi:10.1016/j.cell.2008.12.024

940

941 Skinner A, Khan S, Smith-Bolton RK. 2015. Trithorax regulates systemic signaling

- 942 during *Drosophila* imaginal disc regeneration. *Development* **142**:3500–3511.
- 943 doi:10.1242/dev.122564
- 944
- 945 Smith-Bolton RK, Worley MI, Kanda H, Hariharan IK. 2009. Regenerative Growth in
- 946 *Drosophila* Imaginal Discs Is Regulated by Wingless and Myc. *Dev Cell* **16**:797–809.
- 947 doi:10.1016/j.devcel.2009.04.015
- 948
- 949 Sonoda J, Wharton RP. 2001. *Drosophila* Brain Tumor is a translational repressor.
- 950 *Gene Dev* **15**:762–773. doi:10.1101/gad.870801
- 951
- 952 Stathakis D, Pentz E, Freeman M, Kullman J, Hankins G, Pearlson N, Wright T. 1995.
- 953 The genetic and molecular organization of the Dopa decarboxylase gene cluster of
- 954 *Drosophila melanogaster*. *Genetics* **141**:629–55.
- 955
- 956 Sun G, Irvine KD. 2014. Chapter Four Control of Growth During Regeneration. *Curr Top*
- 957 *Dev Biol* **108**:95–120. doi:10.1016/b978-0-12-391498-9.00003-6
- 958
- 959 Sun G, Irvine KD. 2011. Regulation of Hippo signaling by Jun kinase signaling during
- 960 compensatory cell proliferation and regeneration, and in neoplastic tumors. *Dev Biol*
- 961 **350**:139–151. doi:10.1016/j.ydbio.2010.11.036
- 962
- 963 Takahashi K, Yamanaka S. 2006. Induction of Pluripotent Stem Cells from Mouse
- 964 Embryonic and Adult Fibroblast Cultures by Defined Factors. *Cell* **126**:663–676.

965 doi:10.1016/j.cell.2006.07.024

966

967 Tasaki J, Shibata N, Sakurai T, Agata K, Umesono Y. 2011. Role of c-Jun N-terminal  
968 kinase activation in blastema formation during planarian regeneration. *Dev Growth*  
969 *Differ* **53**:389–400. doi:10.1111/j.1440-169x.2011.01254.x

970

971 Verghese S, Su T. 2017. STAT, Wingless, and Nurf-38 determine the accuracy of  
972 regeneration after radiation damage in *Drosophila*. *Plos Genet* **13**:e1007055.

973 doi:10.1371/journal.pgen.1007055

974

975 Vizcaya-Molina E, Klein CC, Serras F, Mishra RK, Guigó R, Corominas M. 2018.  
976 Damage-responsive elements in *Drosophila* regeneration. *Genome Res* **28**:1852–1866.  
977 doi:10.1101/gr.233098.117

978

979 Vonesch S, Lamparter D, Mackay TF, Bergmann S, Hafen E. 2016. Genome-Wide  
980 Analysis Reveals Novel Regulators of Growth in *Drosophila melanogaster*. *Plos Genet*  
981 **12**:e1005616. doi:10.1371/journal.pgen.1005616

982

983 Watanabe-Fukunaga R, Iida S, Shimizu Y, Nagata S, Fukunaga R. 2005. SEI family of  
984 nuclear factors regulates p53-dependent transcriptional activation. *Genes Cells* **10**:851–  
985 860. doi:10.1111/j.1365-2443.2005.00881.x

986

987 Wehner D, Cizelsky W, Vasudevaro M, Özhan G, Haase C, Kagermeier-Schenk B,

- 988 Röder A, Dorsky RI, Moro E, Argenton F, Köhl M, Weidinger G. 2014. Wnt/ $\beta$ -Catenin  
989 Signaling Defines Organizing Centers that Orchestrate Growth and Differentiation of the  
990 Regenerating Zebrafish Caudal Fin. *Cell Reports* **6**:467–481.  
991 doi:10.1016/j.celrep.2013.12.036  
992  
993 Wright T, Bewley G, Sberaldi A. 1976. The genetics of dopa decarboxylase in  
994 *Drosophila melanogaster*. II. Isolation and characterization of dopa-decarboxylase-  
995 deficient mutants and their relationship to the alpha-methyl-dopa-hypersensitive  
996 mutants. *Genetics* **84**:287–310.  
997  
998 Wright TR, Beermann W, Marsh LJ, Bishop CP, Steward R, Black BC, Tomsett AD,  
999 Wright EY. 1981. The genetics of dopa decarboxylase in *Drosophila melanogaster*.  
1000 *Chromosoma* **83**:45–58. doi:10.1007/bf00286015  
1001  
1002 Wu CD, Johnston LA. 2010. Control of Wing Size and Proportions by *Drosophila* Myc.  
1003 *Genetics* **184**:199–211. doi:10.1534/genetics.109.110379

**Figure 1****A**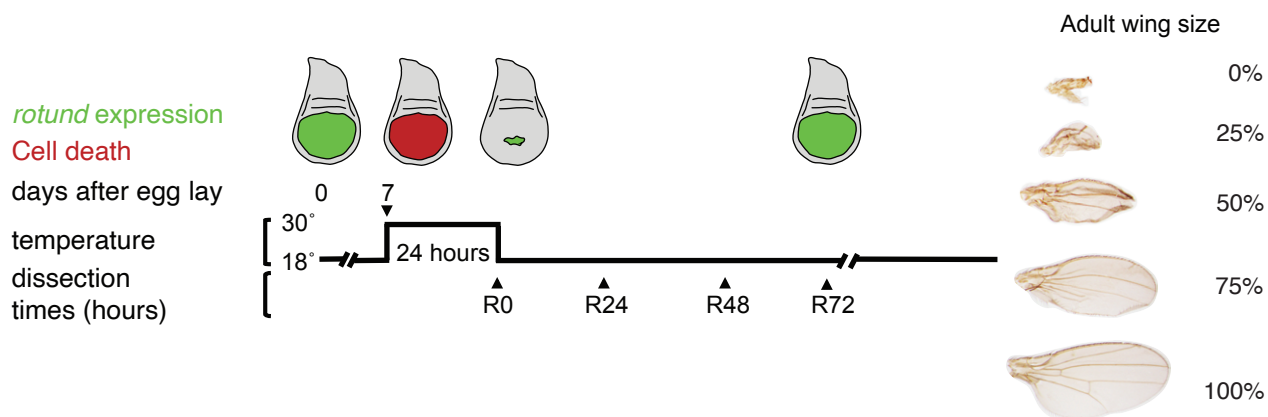**B**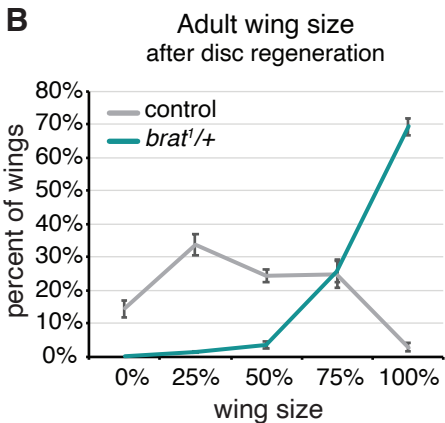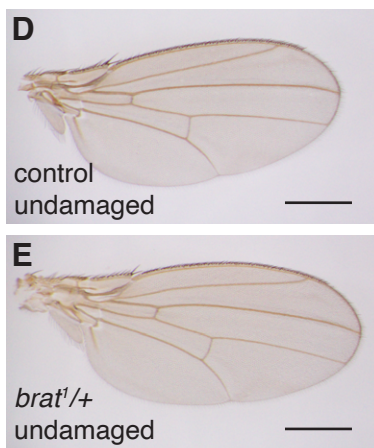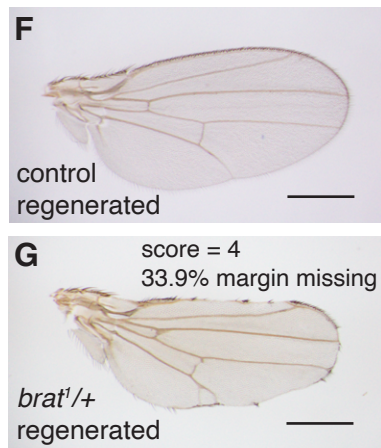**C**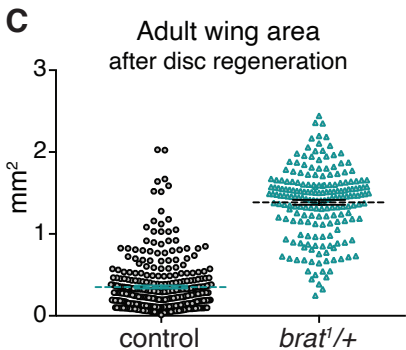**H**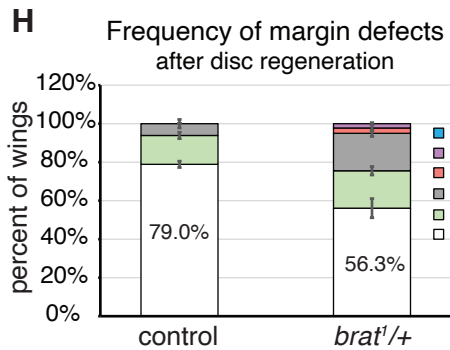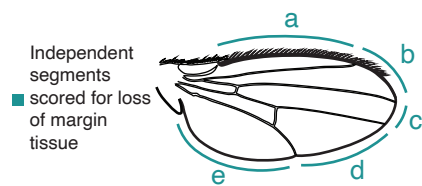**I**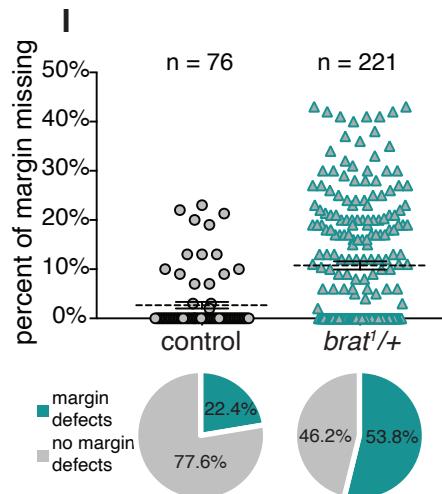

**Figure 1. Enhanced regenerative growth and wing margin cell-fate specification defects in *brat*<sup>1/+</sup> during regeneration.**

(A) The protocol used to study regeneration. Animals were raised at 18°C and shifted to 30°C for 24 hours during early third-instar larval development on day 7 after egg lay (AEL). Larvae were returned to 18°C and were dissected at the time points noted during recovery (R) or allowed to pupariate and eclose. Representative wings depicting the range of adult wing sizes observed after regeneration compared to the size of a normal wing are shown. (B) Adult wing sizes observed after disc regeneration for control (*w*<sup>1118</sup>) (n = 317) and *brat*<sup>1/+</sup> (n = 208) wings, from three independent experiments. (C) Adult wing area after disc regeneration, measured using ImageJ after mounting and imaging wings, for control (*w*<sup>1118</sup>) (n = 309) and *brat*<sup>1/+</sup> (n = 195) wings. p = 2.5158E-119. Wings in (C) are from the same experiments as (B). Note that number of wings in (C) is less for both control and *brat*<sup>1/+</sup> due to some wings being damaged during the mounting process. (D) Undamaged control (*w*<sup>1118</sup>) wing. (E) Undamaged *brat*<sup>1/+</sup> wing. (F) Adult control (*w*<sup>1118</sup>) wing after disc regeneration. (G) Adult *brat*<sup>1/+</sup> wing after disc regeneration. (H) Frequency of margin defects seen in adult wings after disc regeneration for control (*w*<sup>1118</sup>) (n = 93) and *brat*<sup>1/+</sup> (n = 218) wings, from three independent experiments. The wing margin was divided into five segments based on where the veins intersect the margin as shown in the diagram. Each wing was scored for the number of segments that had some margin tissue missing, with wings with a perfectly intact margin scoring at zero. Wing shown in (G) had tissue missing in four segments. (I) Margin tissue lost as a percentage of total wing perimeter for control (*w*<sup>1118</sup>) (n = 76) and *brat*<sup>1/+</sup> (n = 221) wings. p = 9.947E-08. The margin perimeter and



the length of margin tissue lost were measured using ImageJ after mounting and imaging wings. Wings in (I) are from the same experiments as (H). Note that number of wings in the two quantifications is different because we did not quantify wings with length <1.1 mm for males and <1.7 mm for females, to ensure analysis was being carried out on nearly fully regenerated wings. (I). Percentage of wings with no defects fell from 79.0% to 77.6% for control and from 56.3% to 53.8% for *brat<sup>1/+</sup>* wings due to the increased ability to detect lost margin tissue at the higher magnification and resolution achieved by imaging the wings. Wing shown in (G) had 33.9% of margin tissue missing. Error bars mark standard error of the mean (SEM). Student's T-test used for statistical analyses. Scale bars are 0.5 mm.

**Figure 2**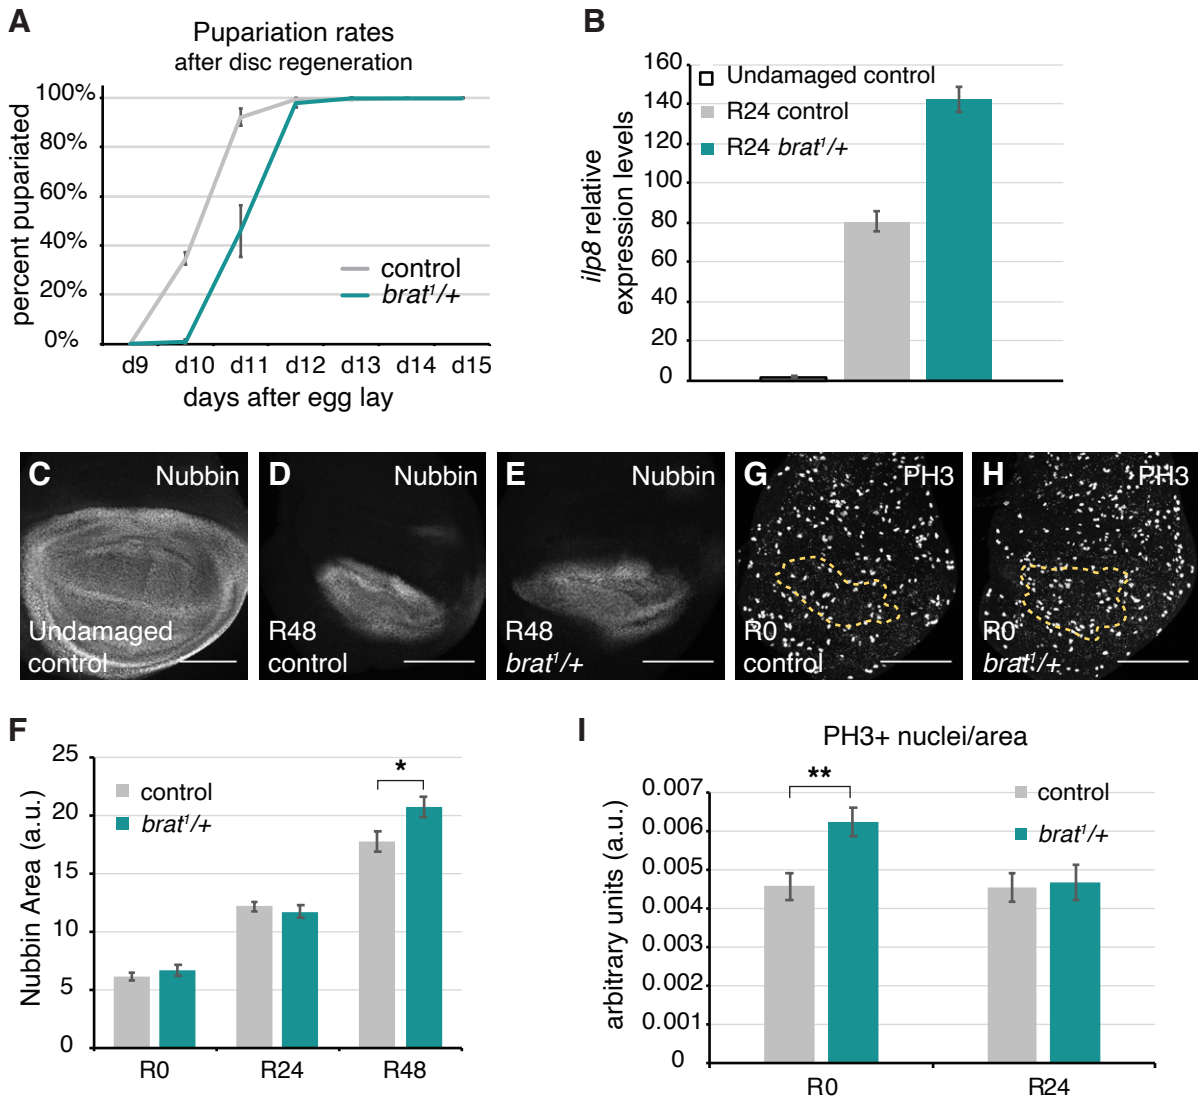

**Figure 2. *brat*<sup>1/+</sup> animals have a regenerative growth advantage.**

(A) Pupariation rates after disc regeneration for control (*w*<sup>1118</sup>) (n = 384) and *brat*<sup>1/+</sup> (n = 107) animals, from three independent experiments. (B) Relative expression levels of *ilp8* for undamaged control, R24 control (*w*<sup>1118</sup>) and R24 *brat*<sup>1/+</sup> discs. (C) Anti-Nubbin immunostaining in an undamaged control disc. (D-E) Anti-Nubbin immunostaining in an R48 control (*w*<sup>1118</sup>) disc (D), and an R48 *brat*<sup>1/+</sup> disc (E). (F) Quantification of area of Nubbin-expressing cells for control (*w*<sup>1118</sup>) and *brat*<sup>1/+</sup> discs at R0 (n = 10 and 10), R24 (n = 12 and 12) and R48 (n = 10 and 10). \* p < 0.03. (G-H) Anti-PH3 immunostaining in an R0 control (*w*<sup>1118</sup>) disc (G), and an R0 *brat*<sup>1/+</sup> disc (H). The yellow dashed lines outline the Nubbin-expressing wing pouch. (I) PH3-positive nuclei were counted within the regenerating tissue as marked by Anti-Nubbin co-immunostaining. Quantification of PH3-positive nuclei in Nubbin area for control (*w*<sup>1118</sup>) and *brat*<sup>1/+</sup> discs at R0 (n = 16 and 18) and R24 (n = 15 and 16). \*\* p < 0.002. Error bars represent SEM. Student's T-test used for statistical analyses. Scale bars are 100 μm.

**Figure 3**

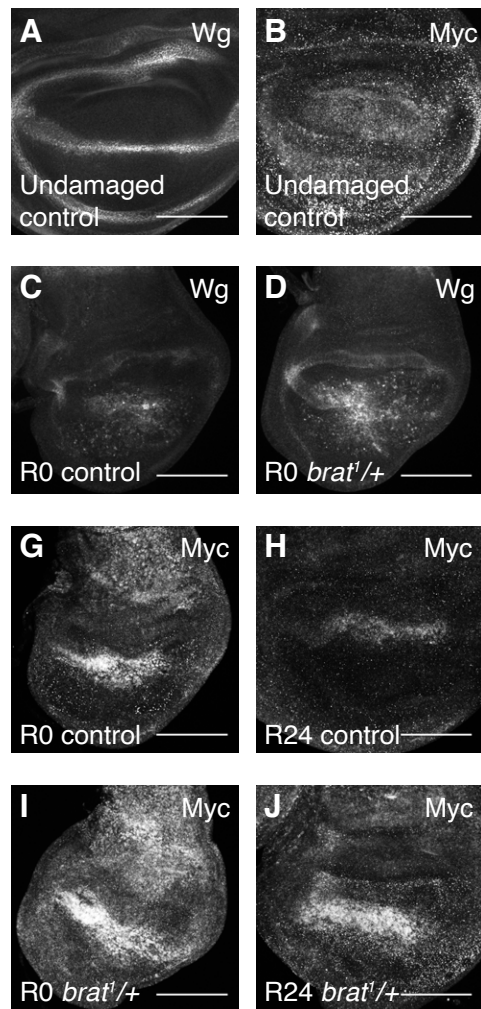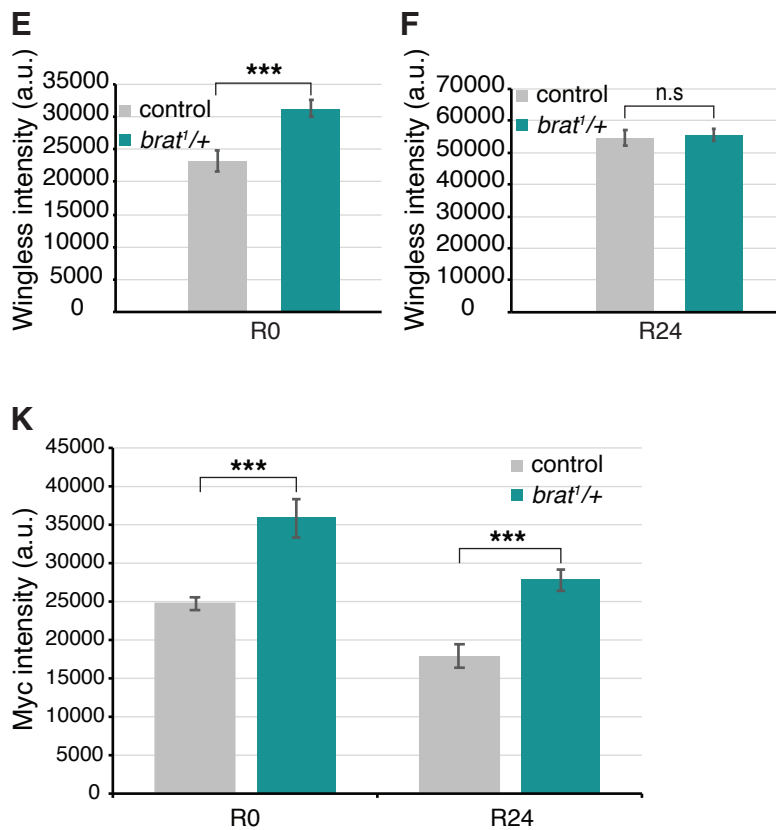

**Figure 3. *brat*<sup>1/+</sup> animals experience elevated regeneration signaling.**

(A) Anti-Wg immunostaining in an undamaged control (*w*<sup>1118</sup>) disc. (B) Anti-Myc immunostaining in an undamaged control (*w*<sup>1118</sup>) disc. (C-D) Anti-Wg immunostaining in an R0 control (*w*<sup>1118</sup>) disc (C) and an R0 *brat*<sup>1/+</sup> disc (D). (E) Quantification of Wg fluorescence intensity in R0 control (*w*<sup>1118</sup>) (n = 13) and R0 *brat*<sup>1/+</sup> (n = 17) discs. \*\*\* p < 0.0006. (F) Quantification of Wg fluorescence intensity in R24 control (*w*<sup>1118</sup>) (n = 12) and R24 *brat*<sup>1/+</sup> (n = 11) discs. Area for fluorescence intensity measurement was defined by the Wg expression domain in the wing pouch. (G-J) Anti-Myc immunostaining in an R0 control (*w*<sup>1118</sup>) disc (G), an R24 control (*w*<sup>1118</sup>) disc (H), an R0 *brat*<sup>1/+</sup> disc (I) and an R24 *brat*<sup>1/+</sup> disc (J). (K) Quantification of Myc fluorescence intensity in R0 control (*w*<sup>1118</sup>) (n = 13), R0 *brat*<sup>1/+</sup> (n = 12), R24 control (*w*<sup>1118</sup>) (n = 13), and R24 *brat*<sup>1/+</sup> (n = 12) discs. Area for fluorescence intensity measurement was defined by the elevated Myc expression domain in the wing pouch. R0 \*\*\* p < 0.0003, R24 \*\*\* p < 0.0001. Error bars represent SEM. Student's T-test used for statistical analyses. Scale bars are 100  $\mu$ m.

**Figure 4**

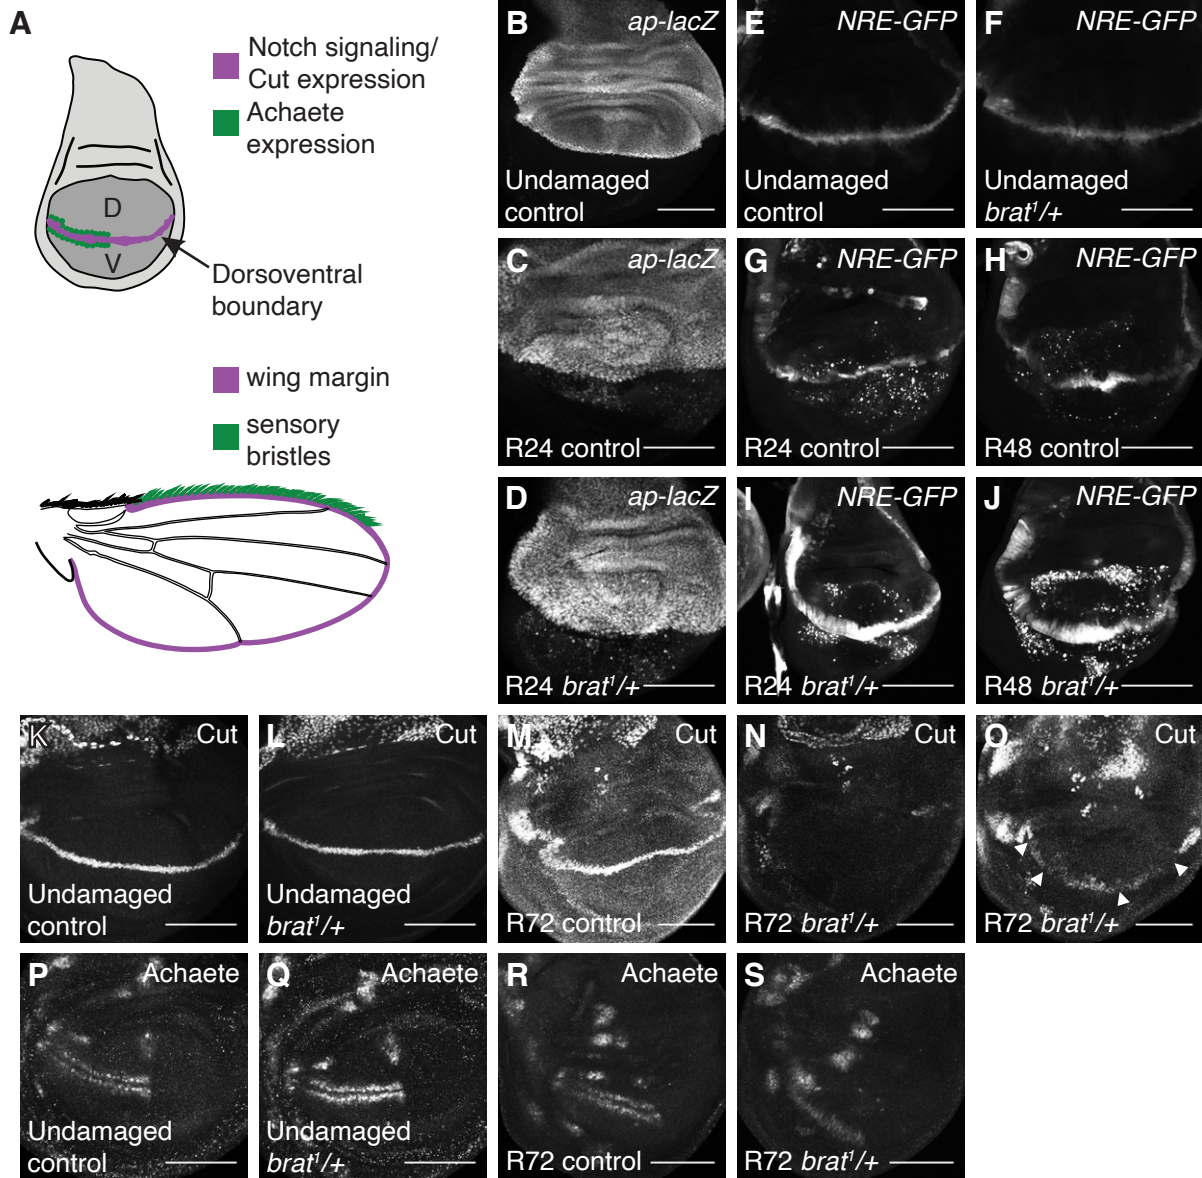

#### Figure 4. *Brat* regulates margin cell-fate specification.

(A) Drawings of a wing imaginal disc and an adult wing. D = dorsal and V = ventral compartments of the wing disc, with the dorsoventral boundary marked in purple. Notch signaling and Cut expression are present at the dorsoventral boundary, which forms the adult wing margin, also marked in purple. Achaete-expressing cells, marked in green, give rise to the sensory bristles at the anterior half of the margin in the adult wing, also marked in green. (B) *ap-lacZ* expression in an undamaged control disc from a third-instar *ap-lacZ/CyO* animal. (C-D) *ap-lacZ* expression in an R24 control (*w<sup>1118</sup>*) disc (C) and an R24 *brat<sup>1/+</sup>* disc (D). (E-F) *NRE-GFP* expression in an undamaged control (*w<sup>1118</sup>*) disc (E) and an undamaged *brat<sup>1/+</sup>* disc (F). (G-J) *NRE-GFP* expression in an R0 control (*w<sup>1118</sup>*) disc (G), an R24 control (*w<sup>1118</sup>*) disc (H), an R0 *brat<sup>1/+</sup>* disc (I) and an R24 *brat<sup>1/+</sup>* disc (J). (K-L) Anti-Ct immunostaining in an undamaged control (*w<sup>1118</sup>*) disc (K) and an undamaged *brat<sup>1/+</sup>* disc (L). (M-O) Anti-Ct immunostaining in an R72 control (*w<sup>1118</sup>*) disc (M) and an R72 *brat<sup>1/+</sup>* discs (N-O). Arrowheads point to loss of Ct expression in (O). (P-Q) Anti-Ac immunostaining in an undamaged control (*w<sup>1118</sup>*) disc (P) and an undamaged *brat<sup>1/+</sup>* disc (Q). (R-S) Anti-Ac immunostaining in an R72 control (*w<sup>1118</sup>*) disc (R) and an R72 *brat<sup>1/+</sup>* disc (S). Scale bars are 100  $\mu$ m.

**Figure 5**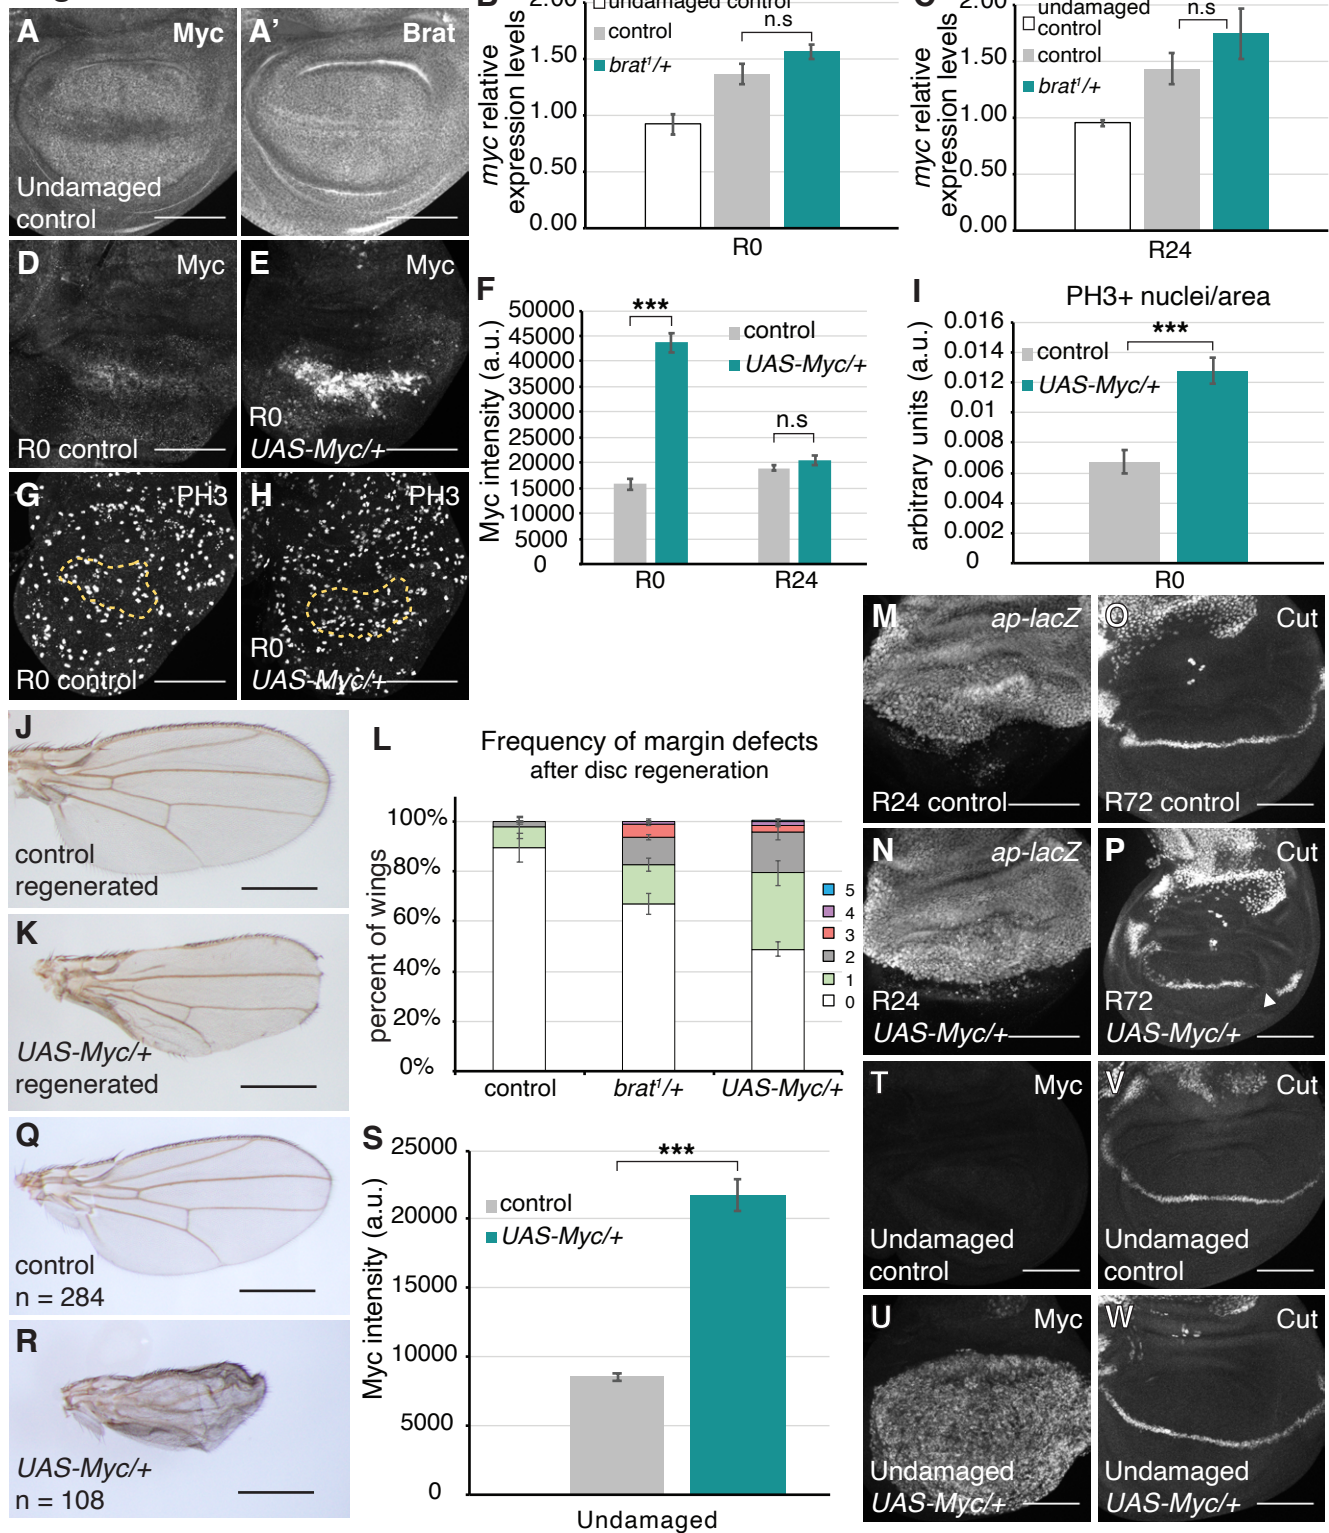



## Figure 5. High Myc expression causes margin defects.

(A-A') Anti-Myc and Anti-Brat co-immunostaining in an undamaged control disc. *rnGAL4, GAL80<sup>ts</sup>/attP2* animals were shifted to 30°C on day 7 AEL and dissected 24 hours later. (B-C) Relative expression levels of *myc* for undamaged control, regenerating control (*w<sup>1118</sup>*), and regenerating *brat<sup>1/+</sup>* discs at R0 (B) and R24 (C). P values for comparison between regenerating control and *brat<sup>1/+</sup>* discs:  $p > 0.1$  at R0, and  $p > 0.3$  at R24. (D-E) Anti-Myc immunostaining in an R0 control (*w<sup>1118</sup>*) disc (D) and an R0 *UAS-Myc/+* disc (E). (F) Quantification of Myc fluorescence intensity in R0 control (*w<sup>1118</sup>*) (n = 13), R0 *UAS-Myc/+* (n = 12), R24 control (*w<sup>1118</sup>*) (n = 13), and R24 *UAS-Myc/+* (n = 12) discs. Area for fluorescence intensity measurement was defined by the elevated Myc expression domain in the wing pouch. \*\*\*  $p = 1.2E-11$ . (G-H) Anti-PH3 immunostaining in an R0 control (*w<sup>1118</sup>*) disc (G), and an R0 *UAS-Myc/+* disc (H). The yellow dashed lines outline the Nubbin-expressing wing pouch. (I) PH3-positive nuclei were counted within the regenerating wing pouch as marked by Anti-Nubbin co-immunostaining. Quantification of PH3-positive nuclei in the Nubbin area for R0 control (*w<sup>1118</sup>*) (n = 15) and *UAS-Myc/+* (n = 15) discs. \*\*\*  $p < 0.00002$ . (J) Adult control (*w<sup>1118</sup>*) wing after disc regeneration. (K) Adult *UAS-Myc/+* wing after disc regeneration. (L) Frequency of margin defects, as quantified in Figure 1H, seen in adult wings after disc regeneration for control (*w<sup>1118</sup>*) (n = 134), *brat<sup>1/+</sup>* (n = 193) and *UAS-Myc/+* (n = 200) wings, from three independent experiments. (M-N) *ap-lacZ* expression in an R24 control (*w<sup>1118</sup>*) disc (M) and an R24 *UAS-Myc/+* disc (N). (O-P) Anti-Ct immunostaining in an R72 control (*w<sup>1118</sup>*) disc (O) and an R72 *UAS-Myc/+* disc (P). (Q) Adult undamaged control (+; *rnGAL4, GAL80ts/+*) wing from animals shifted to 30°C on day 7 AEL and

maintained at 30°C until eclosion. (R) Adult wing from discs continuously overexpressing Myc from day 7 AEL onwards (*UAS-Myc/+; rnGAL4, GAL80ts/+*). (S) Quantification of Myc fluorescence intensity in undamaged discs dissected 31 hours after animals were shifted to 30°C on day 7 AEL. Control (+; *rnGAL4, GAL80ts/+*) (n = 14) and *UAS-Myc* (*UAS-Myc/+; rnGAL4, GAL80ts/+*) (n = 14). Area for fluorescence intensity measurement was defined by the Myc expression domain in the wing pouch. \*\*\* p = 1.2E-11. (T-U) Anti-Myc immunostaining in an undamaged control disc (T) and an undamaged *UAS-Myc/+* disc (U). (V-W) Anti-Ct immunostaining in an undamaged control disc (V) and an undamaged *UAS-Myc/+* disc (W). Error bars represent SEM. Student's T-test used for statistical analyses. Scale bars are 100 µm. Scale bars for adult wings are 0.5 mm.

**Figure 6**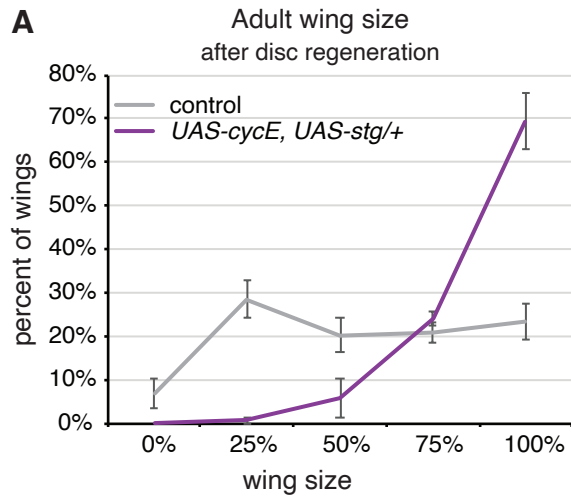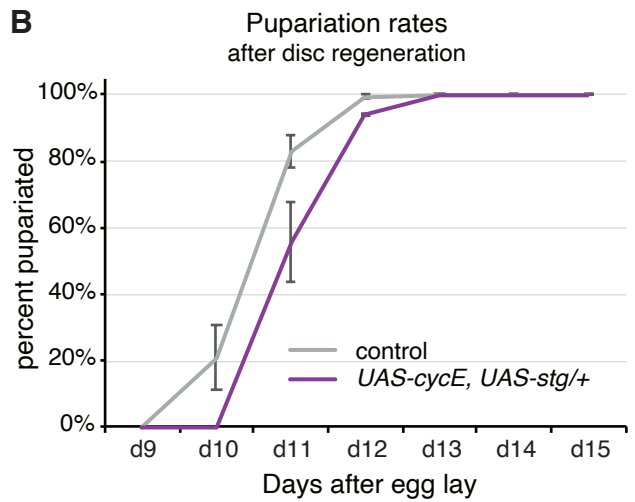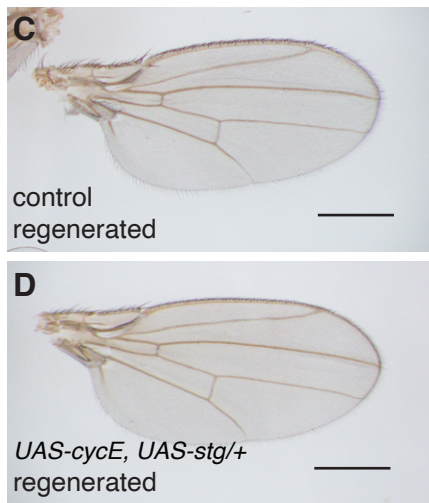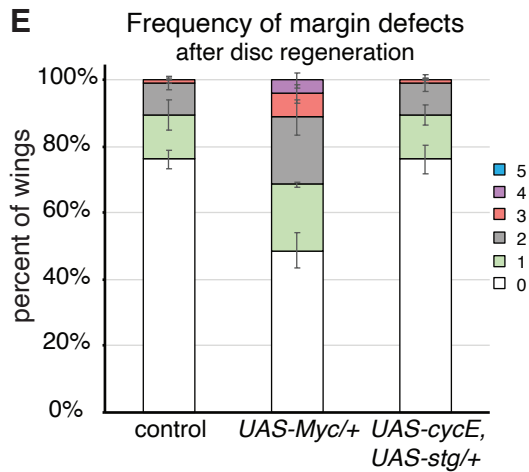

**Figure 6. Overexpression of cell cycle genes does not cause patterning defects.**

(A) Adult wing sizes observed after disc regeneration for control ( $w^{1118}$ ) (n = 280) and *UAS-cycE*, *UAS-stg/+* (n = 194) wings, from three independent experiments. (B) Pupariation rates after disc regeneration for control ( $w^{1118}$ ) (n = 174) and *UAS-cycE*, *UAS-stg/+* (n = 115) wings, from three independent experiments. (C) Adult control ( $w^{1118}$ ) wing after disc regeneration. (D) Adult *UAS-cycE*, *UAS-stg/+* wing after disc regeneration. (E) Frequency of margin defects seen in adult wings after disc regeneration for control ( $w^{1118}$ ) (n = 118), *UAS-Myc/+* (n = 146), and *UAS-cycE*, *UAS-stg/+* (n = 188) wings, from three independent experiments. Error bars represent SEM. Scale bars for adult wings are 0.5 mm.

**Figure 7**

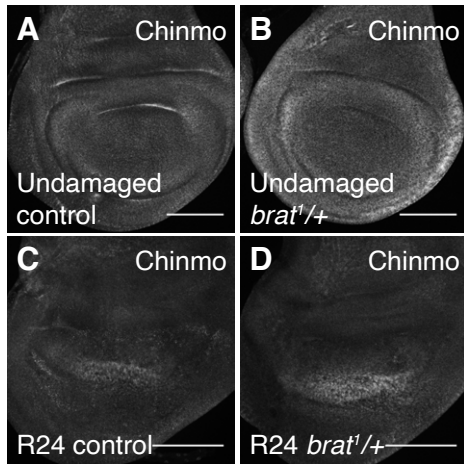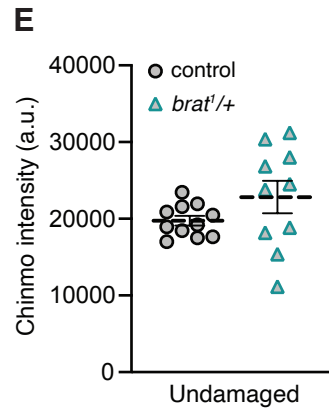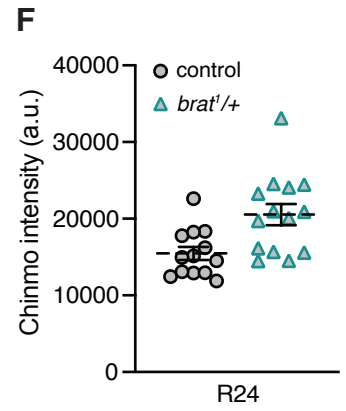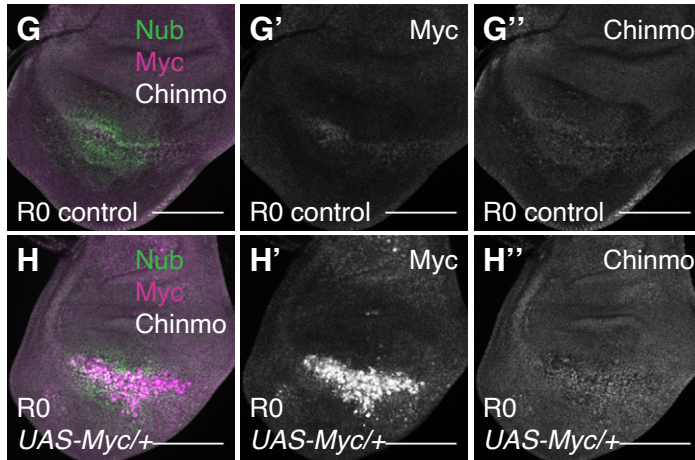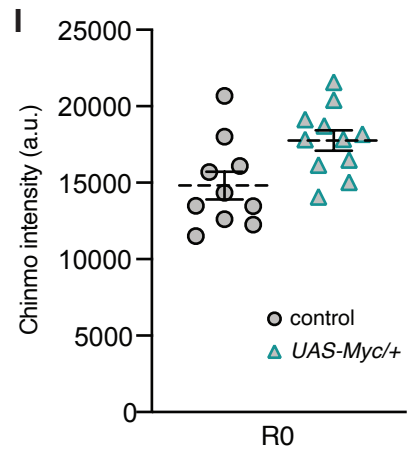

**Figure 7. Chinmo levels are elevated in *brat*<sup>1/+</sup> and Myc-overexpressing regenerating discs.**

(A-B) Anti-Chinmo immunostaining in an undamaged control (*w*<sup>1118</sup>) disc (A) and an undamaged *brat*<sup>1/+</sup> disc (B). (C-D) Anti-Chinmo immunostaining in an R24 control (*w*<sup>1118</sup>) disc (C) and an R24 *brat*<sup>1/+</sup> disc (D). (E) Quantification of Chinmo fluorescence intensity in undamaged control (*w*<sup>1118</sup>) (n = 11) and undamaged *brat*<sup>1/+</sup> (n = 10) discs. (F) Quantification of Chinmo fluorescence intensity in R24 control (*w*<sup>1118</sup>) (n = 13) and R24 *brat*<sup>1/+</sup> (n = 14) discs. p < 0.006. Area for fluorescence intensity measurement was defined by the elevated Chinmo expression domain in the wing pouch. (G) Merge of anti-Nubbin, anti-Myc and anti-Chinmo immunostaining in an R0 control (*w*<sup>1118</sup>) disc. (G'-G'') Same disc as (G) showing anti-Myc and anti-Chinmo immunostaining, respectively. (H) Merge of anti-Nubbin, anti-Myc and anti-Chinmo immunostaining in an R0 *brat*<sup>1/+</sup> disc. (H'-H'') Same disc as (H) showing anti-Myc and anti-Chinmo immunostaining, respectively. (I) Quantification of Chinmo fluorescence intensity in R0 control (*w*<sup>1118</sup>) (n = 10) and R0 *UAS-Myc/+* (n = 11) discs. p < 0.02. Area for fluorescence intensity measurement was defined by the elevated Myc expression domain in the wing pouch. Error bars represent SEM. Student's T-test used for statistical analyses. Scale bars are 100  $\mu$ m.

Figure 8

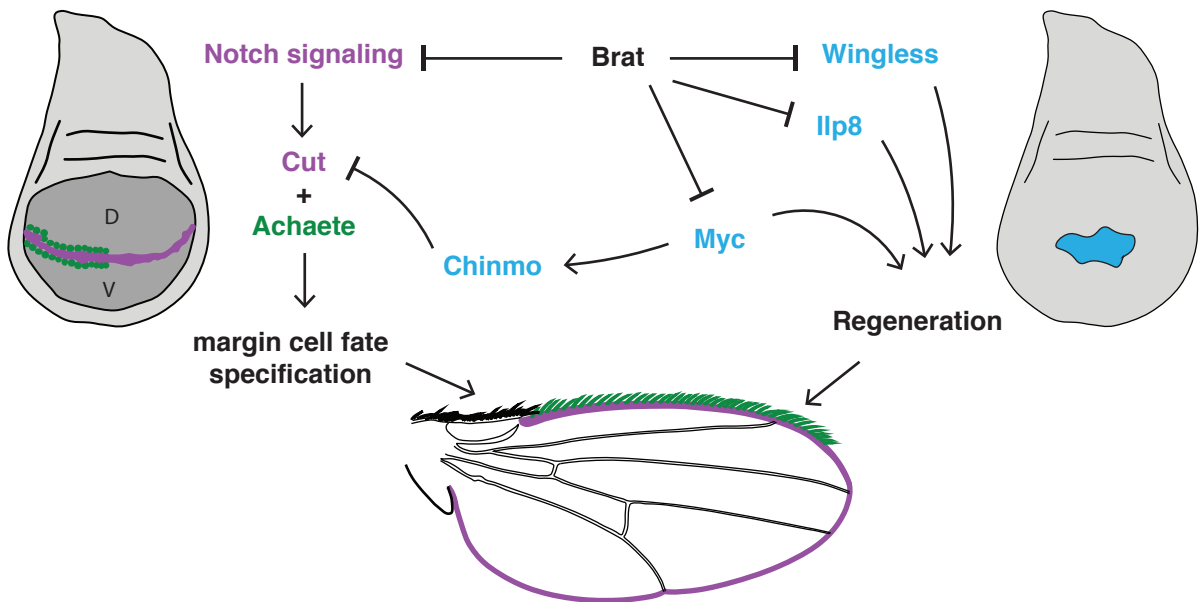

**Figure 8. Brat restricts pro-regeneration factors and ensures correct margin cell-fate specification.**

Model describing the network of Brat targets in the regenerating wing imaginal disc. Importantly, Brat restricts Myc levels, limiting expression of Myc's targets, including Chinmo, to allow correct margin cell-fate specification.



**Figure S1**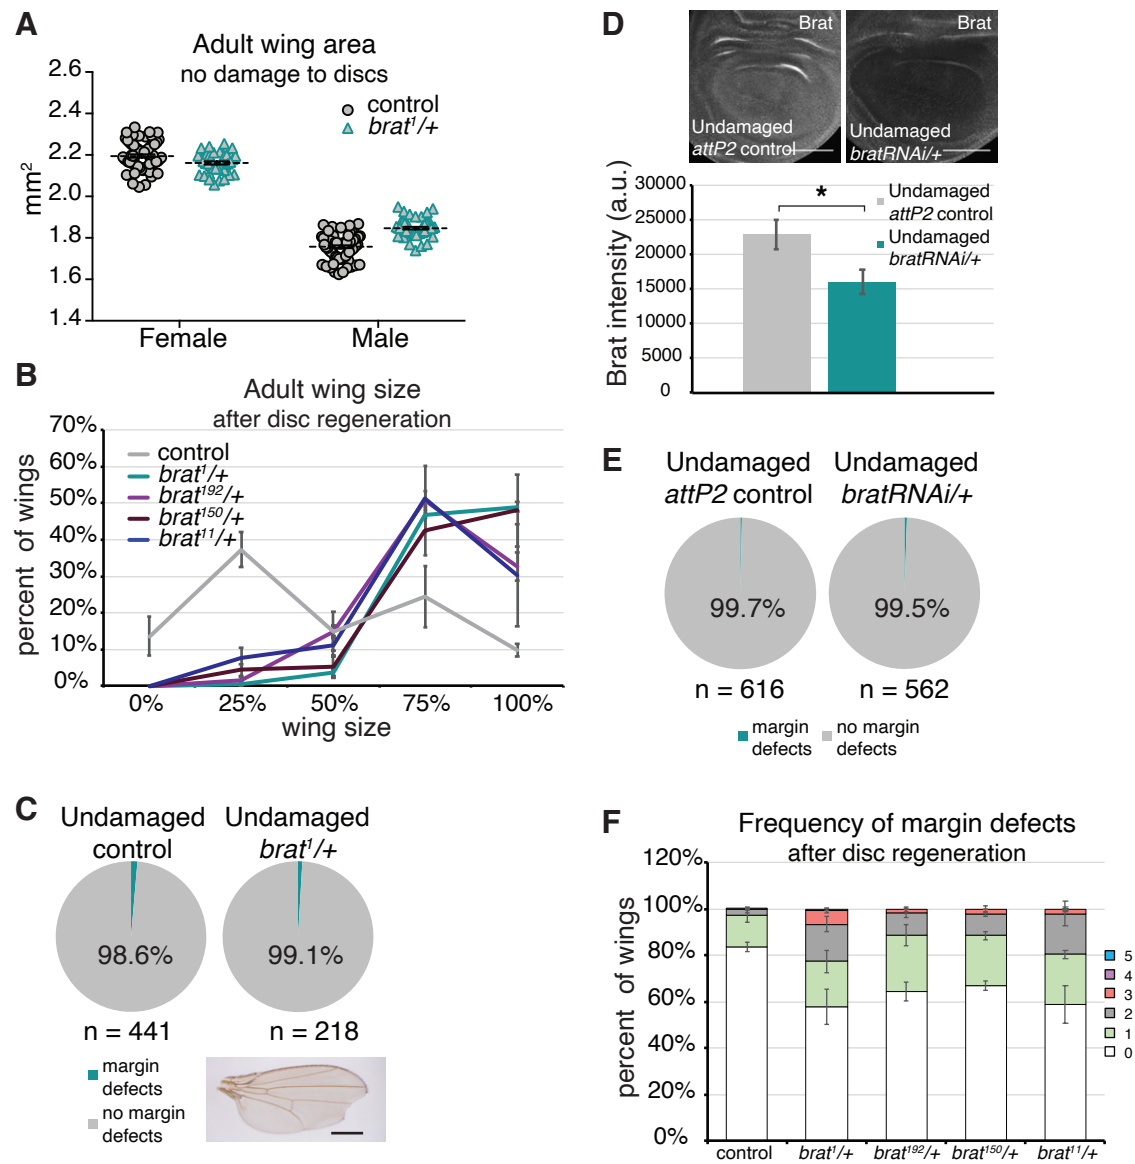

**Figure S1. Loss of *brat* does not cause enhanced growth or margin defects during normal development (Related to Figure 1).**

(A) Adult wing area measured using ImageJ after mounting and imaging wings, for undamaged control ( $w^{1118}$ ) (n = 63 female and 70 male) and *brat*<sup>1/+</sup> (n = 38 female and 48 male) wings. *rnGAL4*, *GAL80<sup>ts</sup>/TM6B* females were crossed to  $w^{1118}$  or *brat*<sup>1/SM6-TM6B</sup> males and taken through the protocol shown in Figure 1A. (B) Adult wing sizes after disc regeneration for control ( $w^{1118}$ ) (n = 599), *brat*<sup>1/+</sup> (n = 199), *brat*<sup>192/+</sup> (n = 237), *brat*<sup>150/+</sup> (n = 235) and *brat*<sup>11/+</sup> (n = 188) wings, from three independent experiments. (C) Margin defects detected in adult wings from undamaged control ( $w^{1118}$ ) and *brat*<sup>1/+</sup> discs. *rnGAL4*, *GAL80<sup>ts</sup>/TM6B* females were crossed to  $w^{1118}$  or *brat*<sup>1/SM6-TM6B</sup> males and taken through the protocol shown in Figure 1A. Margin defects detected in the undamaged wings were never as severe as the ones seen in *brat*<sup>1/+</sup> wings after disc regeneration. A representative wing with margin defects is shown. (D) Anti-Brat immunostaining in undamaged control (*attP2*) and *bratRNAi/+* discs. *rnGAL4*, *GAL80<sup>ts</sup>/TM6B* females were crossed to *attP2* or *bratRNAi* males. Larvae were kept at 18°C and shifted to 30°C on day 7 AEL. Discs were dissected 24 hours after the shift to 30°C. Quantification of Brat fluorescence intensity in undamaged control (*attP2*) (n = 15) and *bratRNAi/+* (n = 15) discs. Area for fluorescence intensity measurement was defined by wing pouch morphology and Anti-Myc co-immunostaining. \* p = 0.02. (E) Margin defects detected in adult wings from undamaged control (*attP2*) and *bratRNAi* discs. *rnGAL4*, *GAL80<sup>ts</sup>/TM6B* females were crossed to *attP2* or *bratRNAi* males. Larvae were kept at 18°C and shifted to 30°C on day 7 AEL and kept there until eclosion. (F) Frequency of margin defects seen in adult wings after disc regeneration for control

(*w<sup>1118</sup>*) (n = 240), *brat<sup>1</sup>/+* (n = 191), *brat<sup>192</sup>/+* (n = 196), *brat<sup>150</sup>/+* (n = 213) and *brat<sup>11</sup>/+* (n = 152) wings. Wings in (G) are from the same experiments as (B). Error bars represent SEM. Student's T-test used for statistical analyses. Scale bars are 100  $\mu$ m. Scale bars for adult wings are 0.5 mm.

**Figure S2**

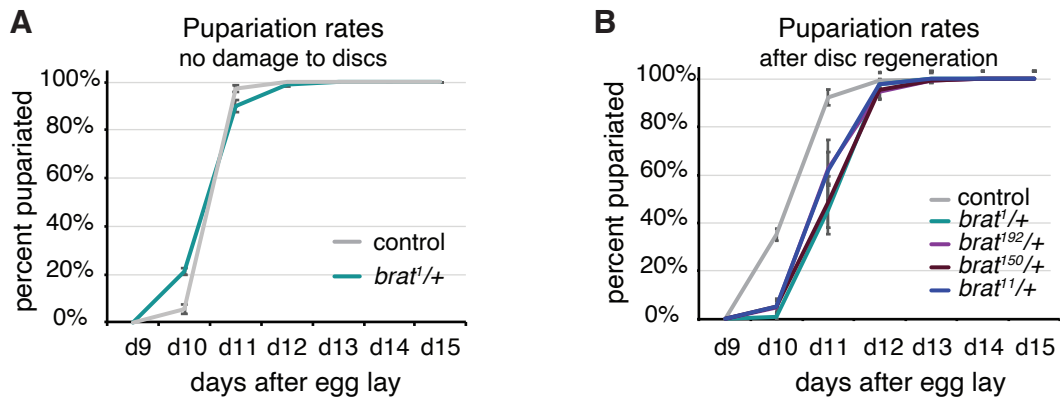

**C** PH3+ nuclei/Nubbin-positive nuclei

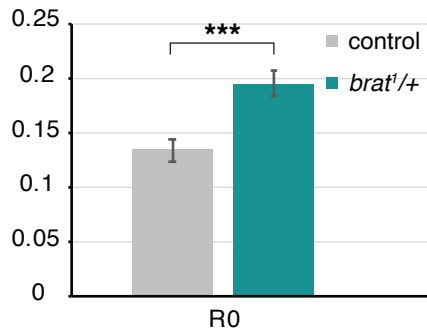

**Figure S2. Loss of *brat* delays pupariation in a regeneration-specific manner**  
**(Related to Figure 2).**

(A) Pupariation rates in undamaged control ( $w^{1118}$ ) (n = 221) and *brat*<sup>1/+</sup> (n = 110) animals, from three independent experiments. (B) Pupariation rates after disc regeneration for control ( $w^{1118}$ ) (n = 384), *brat*<sup>1/+</sup> (n = 107), *brat*<sup>192/+</sup> (n = 131), *brat*<sup>150/+</sup> (n = 114) and *brat*<sup>11/+</sup> (n = 113) animals. Pupariation rates are from the same experiments as in Figure 2A. (C) PH3-positive nuclei were counted within the regenerating tissue as marked by Anti-Nubbin co-immunostaining. Total number of nuclei were also counted in the Nubbin expressing region. Ratio of PH3-positive nuclei and total Nubbin-positive nuclei for control ( $w^{1118}$ ) and *brat*<sup>1/+</sup> discs at R0 (n = 16 and 18). \*\*\* p < 0.0005. Error bars represent SEM. Student's T-test used for statistical analyses. Error bars represent SEM.

**Figure S3**

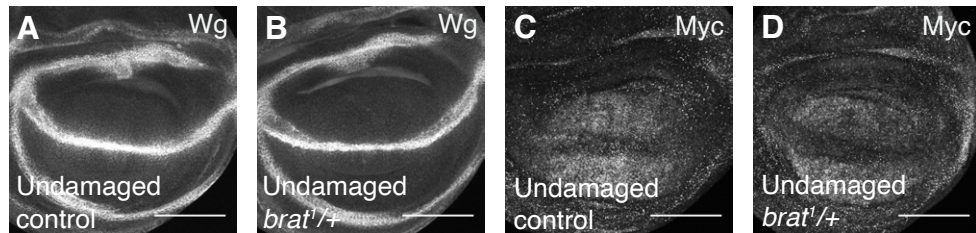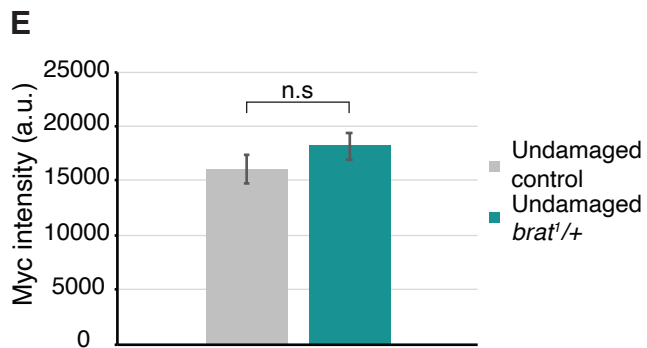

**Figure S3. Effects of loss of *brat* on Wg and Myc expression are regeneration-specific (Related to Figure 3).**

(A-B) Anti-Wg immunostaining in an undamaged control ( $w^{1118}$ ) disc (A) and an undamaged *brat*<sup>1/+</sup> disc (B). (C-D) Anti-Myc immunostaining in an undamaged control ( $w^{1118}$ ) disc (C) and an undamaged *brat*<sup>1/+</sup> disc (D). (E) Quantification of Myc fluorescence intensity in undamaged control ( $w^{1118}$ ) (n = 10) and *brat*<sup>1/+</sup> (n = 10) discs. Area for fluorescence intensity measurement was defined by wing pouch morphology and the elevated Myc expression domain in the wing pouch. Error bars represent SEM. Student's T-test used for statistical analyses. Scale bars are 100  $\mu$ m.

**Figure S4**

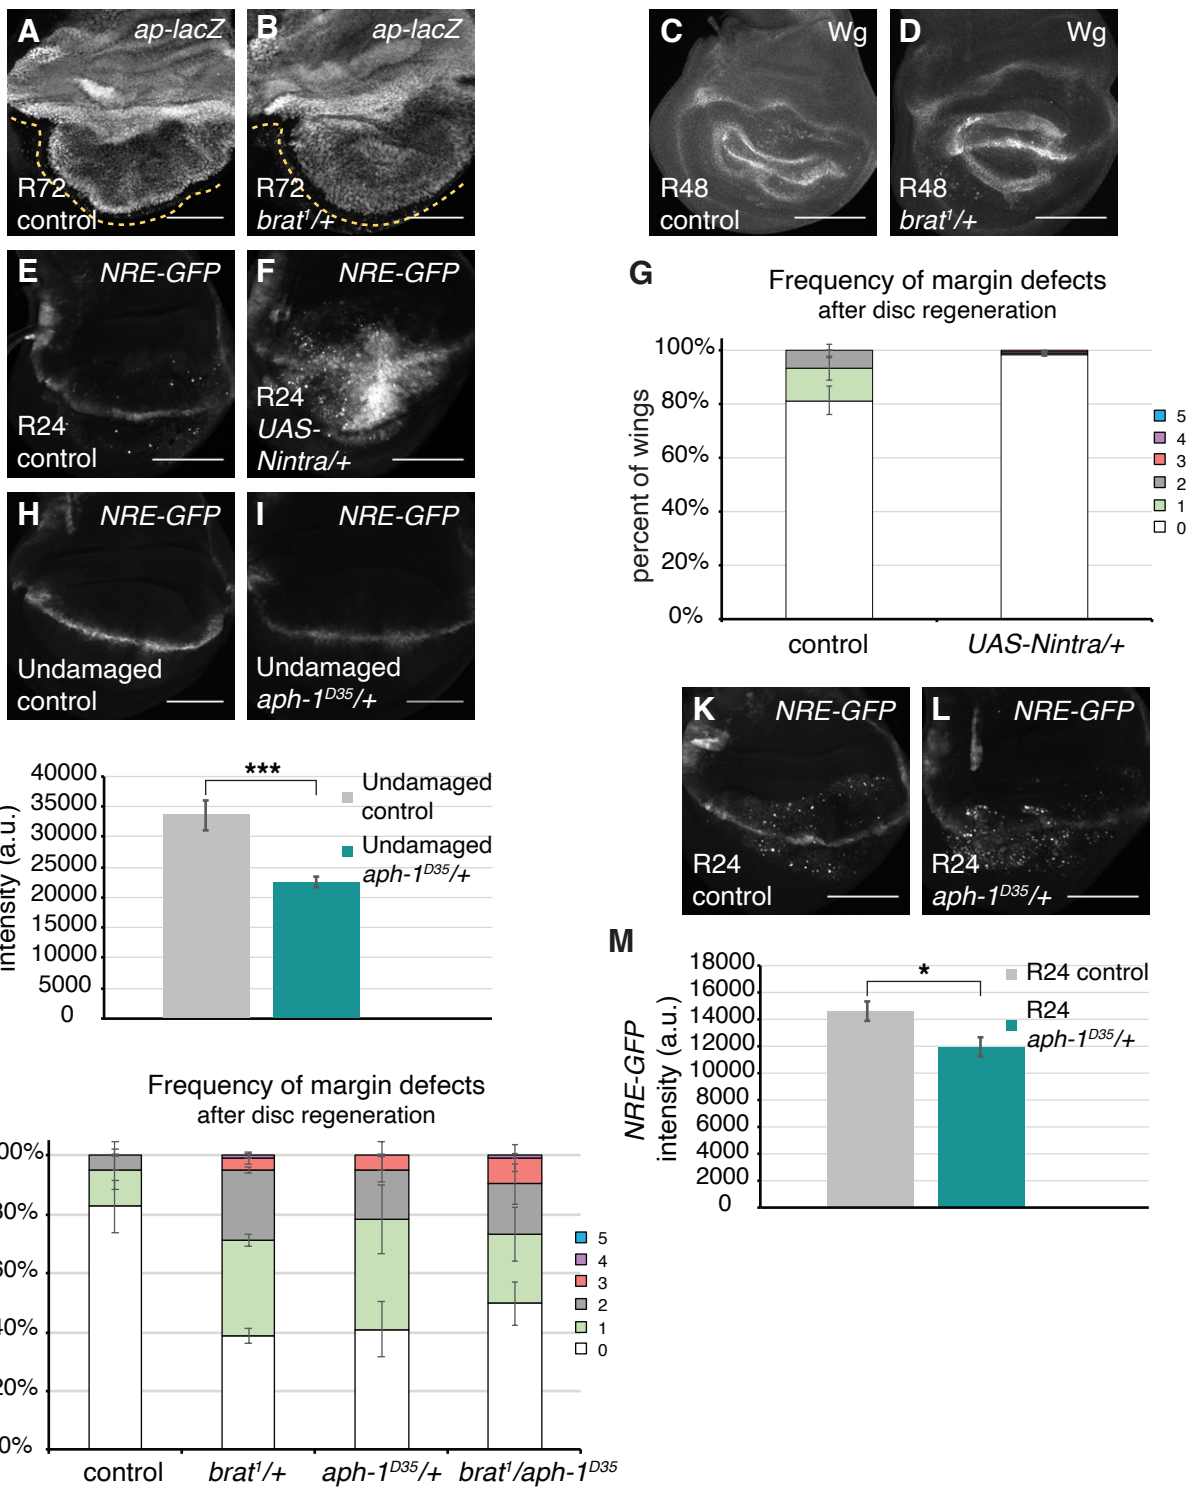



**Figure S4. Elevated Notch signaling does not cause margin defects (Related to Figure 4).**

(A-B) *ap-lacZ* expression in an R72 control (*w<sup>1118</sup>*) disc (A) and an R72 *brat<sup>1/+</sup>* disc (B). Dashed yellow lines are drawn next to the DV boundary to highlight it. (C-D) Anti-Wg immunostaining in an R48 control (*w<sup>1118</sup>*) disc (C) and an R48 *brat<sup>1/+</sup>* disc (D). (E-F) *NRE-GFP* expression in an R24 control (*w<sup>1118</sup>*) disc (E) and an R24 *UAS-Nintra/+* disc (F). (G) Frequency of margin defects seen in adult wings after disc regeneration for control (*w<sup>1118</sup>*) (n = 84) and *UAS-Nintra/+* (n = 357) wings, from five independent experiments. (H-I) *NRE-GFP* expression in an undamaged control (*w<sup>1118</sup>*) disc (H) and an undamaged *aph-1<sup>D35/+</sup>* disc (I). *NRE-GFP/+* and *NRE-GFP/aph-1<sup>D35</sup>* animals were raised at room temperature and dissected during third instar. (J) Quantification of GFP intensity in undamaged control (*w<sup>1118</sup>*) (n = 15) and *aph-1<sup>D35/+</sup>* (n = 15) discs. \*\*\* p < 0.0006. (K-L) *NRE-GFP* expression in an R24 control (*w<sup>1118</sup>*) disc (K) and an R24 *aph-1<sup>D35/+</sup>* disc (L). (M) Quantification of GFP intensity in R24 control (*w<sup>1118</sup>*) (n = 13) and R24 *aph-1<sup>D35/+</sup>* (n = 11) discs. \* p < 0.02. (N) Frequency of margin defects in adult wings after disc regeneration for control (*w<sup>1118</sup>*) (n = 21), *brat<sup>1/+</sup>* (n = 137), *aph-1<sup>D35/+</sup>* (n = 38) and *brat<sup>1</sup>/aph-1<sup>D35</sup>* (n = 80) wings. Error bars represent SEM. Student's T-test used for statistical analyses. Scale bars are 100  $\mu$ m.

**Figure S5**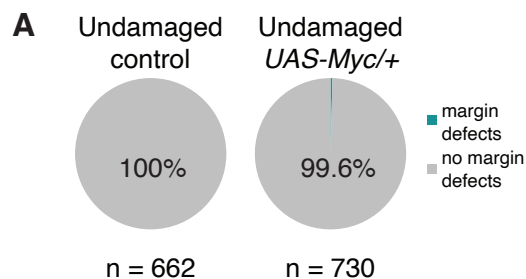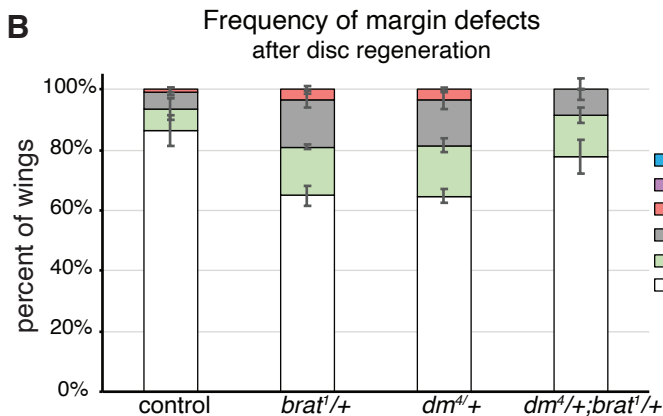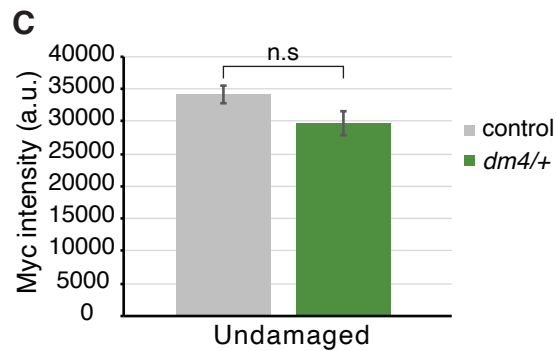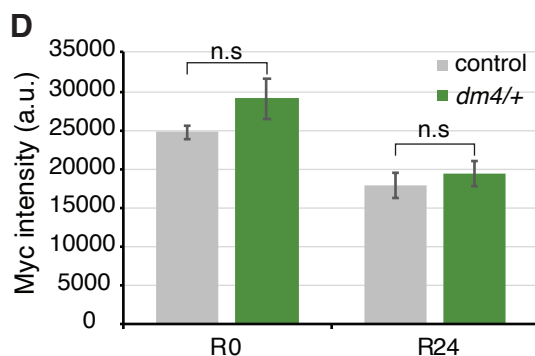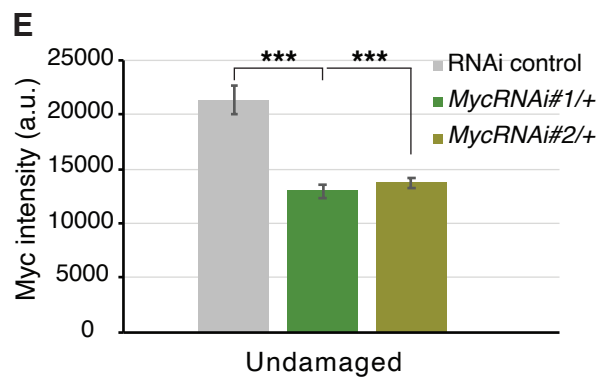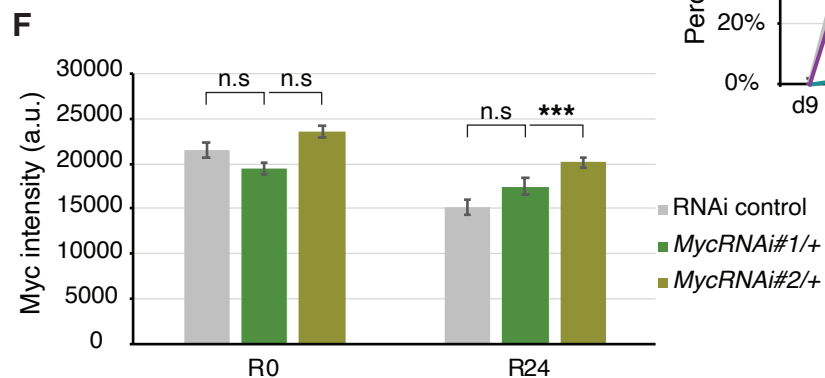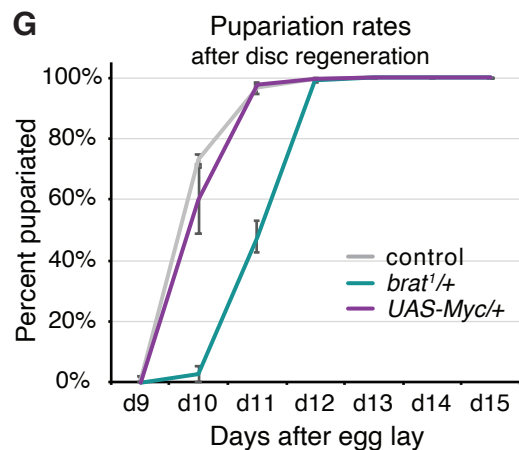

**Figure S5. Compensatory regulation prevents reduction of Myc expression during regeneration (Related to Figure 5).**

(A) Margin defects detected in adult wings from undamaged control ( $w^{1118}$ ) and *UAS-Myc/+* discs. *rnGAL4, GAL80<sup>ts</sup>/TM6B* females were crossed to  $w^{1118}$  or *UAS-Myc* males and taken through the protocol shown in Figure 1A. (B) Frequency of margin defects in adult wings after disc regeneration for control ( $w^{1118}$ ) (n = 103), *brat<sup>1/+</sup>* (n = 203), *dm<sup>4/+</sup>* (n = 94) and *dm<sup>4/+</sup>; brat<sup>1/+</sup>* (n = 94) wings, from three independent experiments. (C) Quantification of Myc fluorescence intensity in undamaged control ( $w^{1118}$ ) (n = 12) and *dm<sup>4/+</sup>* (n = 11) discs.  $w^{1118}$  females were crossed to  $w^{1118}$  or *dm<sup>4</sup>/FM7i, ActGFP* males and dissected when the animals were third instar. Area for fluorescence intensity measurement was defined by wing pouch morphology and the elevated Myc expression domain in the wing pouch. (D) Quantification of Myc fluorescence intensity in R0 control ( $w^{1118}$ ) (n = 13), R0 *dm<sup>4/+</sup>* (n = 10), R24 control ( $w^{1118}$ ) (n = 13), and R24 *dm<sup>4/+</sup>* (n = 10) discs. Area for fluorescence intensity measurement was defined by the elevated Myc expression domain in the wing pouch. (E) Quantification of Myc fluorescence intensity in undamaged control (VDRC genetic background line, called control) (n = 14), *MycRNAi#1/+* (n = 12), and *MycRNAi#2/+* (n = 13) discs. *rnGAL4, GAL80<sup>ts</sup>/TM6B* females were crossed to the control, *MycRNAi#1*, or *MycRNAi#2* males. The animals were shifted to 30°C during early third instar and kept there for 28 hours then dissected. *MycRNAi#1/+* \*\*\* p < 0.000007, *MycRNAi#2/+* \*\*\* p < 0.00002. Area for fluorescence intensity measurement was defined by wing pouch morphology. (F) Quantification of Myc fluorescence intensity in R0 control (n = 13), R0 *MycRNAi#1/+* (n = 15), R0 *MycRNAi#2/+* (n = 13), R24 control (n = 13), R24 *MycRNAi#1/+* (n = 13), and R24

*MycRNAi#2/+* (n = 13) discs. Fluorescence intensity was measured in the area marked by Anti-Nubbin immunostaining. \*\*\* p < 0.00007. (G) Pupariation rates after disc regeneration for control (*w<sup>1118</sup>*) (n = 216), *brat<sup>1/+</sup>* (n = 114) and *UAS-Myc/+* (n = 209) animals, from three independent experiments. Error bars represent SEM. Student's T-test used for statistical analyses.

**Figure S6**

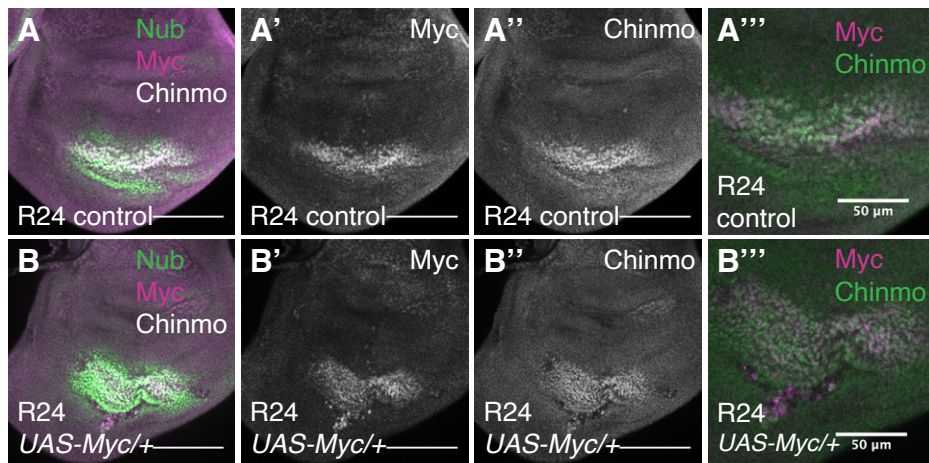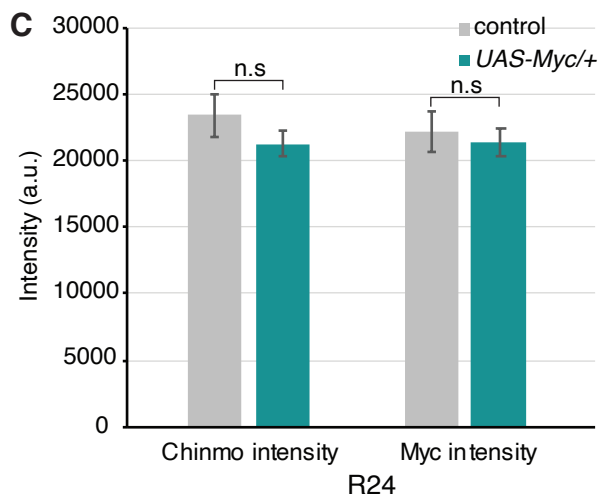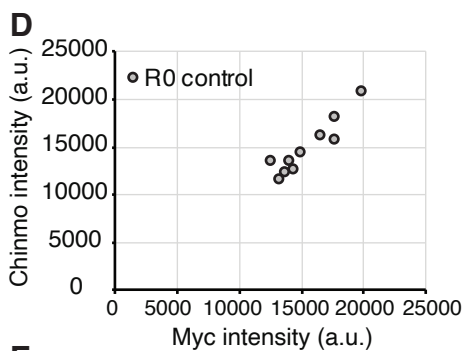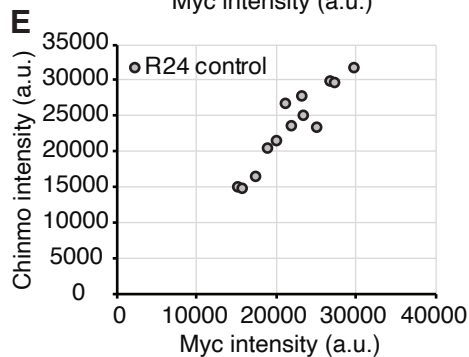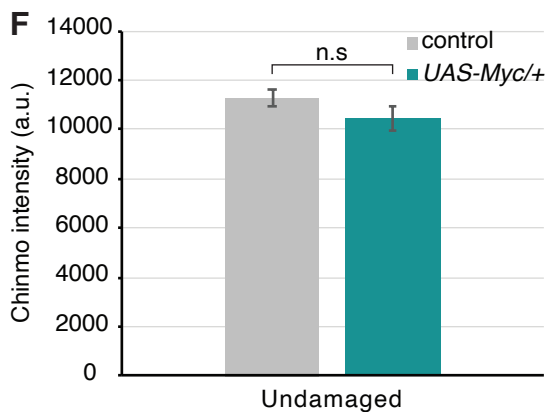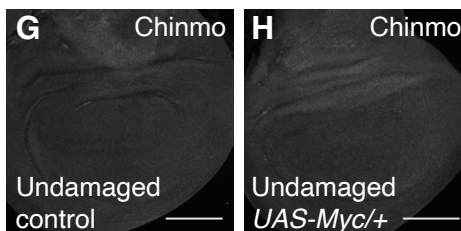

## Figure S6. Myc regulates Chinmo expression (Related to Figure 7).

(A) Merge of anti-Nubbin, anti-Myc and anti-Chinmo immunostaining in an R24 control ( $w^{1118}$ ) disc. (A'-A'') Same disc as (A) showing anti-Myc and anti-Chinmo immunostaining, respectively. (A''') Same disc as (A) showing an enlarged merge of anti-Myc and anti-Chinmo immunostaining. (B) Merge of anti-Nubbin, anti-Myc and anti-Chinmo immunostaining in an R24 *UAS-Myc/+* disc. (B'-B'') Same disc as (B) showing anti-Myc and anti-Chinmo immunostaining, respectively. (B''') Same disc as (B) showing an enlarged merge of anti-Myc and anti-Chinmo immunostaining. (C) Quantification of Chinmo and Myc fluorescence intensity in R24 control ( $w^{1118}$ ) ( $n = 13$ ) and R24 *UAS-Myc/+* ( $n = 14$ ) discs. Area for fluorescence intensity measurement was defined by the elevated Myc expression domain in the wing pouch. Note that Myc and Chinmo expression co-localize. (D-E) Scatter plot showing correlation between Myc and Chinmo expression levels at R0 (D) and R24 (E). Pearson correlation coefficient for R0 = 0.93 and R24 = 0.94. (F) Quantification of Chinmo fluorescence intensity in undamaged discs dissected 31 hours after animals were shifted to 30°C on day 7 AEL. Control (+;*rnGAL4,GAL80ts/+*) ( $n = 14$ ) and *UAS-Myc (UAS-Myc/+; rnGAL4, GAL80ts/+)* ( $n = 14$ ). Area for fluorescence intensity measurement was defined by the Myc expression domain in the wing pouch. (G-H) Anti-Chinmo immunostaining in an undamaged control disc (G) and an undamaged *UAS-Myc/+* disc (H). Error bars represent SEM. Student's T-test used for statistical analyses. Scale bars are 100  $\mu\text{m}$ , unless stated otherwise.
